1 **Title:**

2 **Morning and Evening Circadian Pacemakers Independently Drive Premotor Centers via a**  
3 **Specific Dopamine Relay**

4

5 **Authors:** Xitong Liang<sup>1</sup>, Margaret C.W. Ho<sup>2</sup>, Mark N. Wu<sup>2</sup>, Timothy E. Holy<sup>1</sup> & Paul H.  
6 Taghert<sup>1\*</sup>

7

8 **Affiliations:**

9 1. Department of Neuroscience, Washington University in St. Louis, MO 63110, USA

10 2. Department of Neurology, Johns Hopkins University School of Medicine, Baltimore, MD  
11 21205, USA

12 \*Correspondence to: taghertp@pcg.wustl.edu

## 13 **Abstract**

14 Many animals exhibit morning and evening peaks of locomotor behavior. In *Drosophila*,  
15 previous studies identified two corresponding circadian neural oscillators: M (morning) cells  
16 which exhibit a morning neural activity peak, and E (evening) cells which exhibit a  
17 corresponding evening peak of activity. Yet we know little of how these distinct circadian  
18 oscillators produce specific outputs that regulate pre-motor circuits to precisely control  
19 behavioral episodes. Here we show that the Ring Neurons of the Ellipsoid Body (EB-RNs), a  
20 defined pre-motor center, display a spontaneous *in vivo* neural activity rhythm, with peaks in the  
21 morning and in the evening. The two EB-RN activity peaks coincide with the major bouts of  
22 locomotor activity and result from independent activation by M and E cells, respectively.  
23 Further, M and E cells regulate EB-RNs via two identified dopaminergic neurons PPM3-EB,  
24 which project to the EB and which are normally co-active with EB-RNs. Blocking the  
25 dopaminergic modulation onto EB-RNs prevents the daily two-peak pattern of neural activity in  
26 the EB-RN and greatly impairs circadian locomotor activity. These *in vivo* findings establish the  
27 fundamental elements of a circadian neuronal output pathway: distinct circadian oscillators  
28 independently drive a common pre-motor center through the agency of specific dopaminergic  
29 interneurons.

## 30 Main Text

31 Circadian rhythms provide adaptive value by promoting expression of diverse  
32 physiological processes and behaviors at specific times of the day. In mammals, rhythms in  
33 hormone release, rest/activity cycles, body temperature, and metabolism are all controlled by the  
34 multi-oscillator system of pacemakers in the suprachiasmatic nucleus (SCN) of the anterior  
35 hypothalamus. Numerous studies have documented that the SCN uses hormonal and neuronal  
36 signaling to provide adaptive phasic information across all times of day (Lehman *et al.*, 1987;  
37 Moore and Klein, 1974; Ralph *et al.*, 1990, De la Iglesia *et al.*, 2003; Kalsbeek *et al.*, 2006;  
38 VanderLeest *et al.*, 2007). However, the information connecting SCN signaling to neural circuits  
39 that translate its outputs is fragmentary. Lacking direct *in vivo* experimental observations, the  
40 definition of circadian output networks remains a significant challenge.

41 In *Drosophila*, a prominent circadian output is the daily locomotor activity rhythm, which  
42 peaks once around dawn and again around dusk (Figure 1c). The rhythm is controlled by  
43 molecular clocks that cycle synchronously within ~ 150 circadian pacemaker neurons (Nitabach  
44 & Taghert, 2008). Among these circadian neurons, two separate groups (termed M cells and E  
45 cells) control the morning and evening activity peaks respectively (Stoleru *et al.*, 2004; Grima *et*  
46 *al.*, 2004; Yoshii *et al.*, 2004). Previously we reported that different groups of circadian neurons  
47 display rhythmic but asynchronous circadian neural activity *in vivo*: they peak at different yet  
48 stereotyped times of day (Liang *et al.*, 2016). These neural activity rhythms depend on their  
49 synchronous molecular clocks, but their activity peak times are staggered, by neuropeptide-  
50 mediated interactions between circadian neuron groups. This allows the network to create  
51 multiple phasic time points (Liang *et al.*, 2017). Consequently, M cells peak in the morning and

52 E cells peak in the evening. The distinct peak times of M cells and E cells could potentially guide  
53 output motor circuits to generate independent morning and evening locomotor behavioral peaks.

54 Based on limited screens in *Drosophila*, two groups of identified peptidergic neurons  
55 were implicated in previous reports as components of output circuits for locomotor activity  
56 rhythms: specifically, these included neurons that express the diuretic hormone 44 (DH44), an  
57 orthologue of mammalian CRF (Cavanaugh *et al.*, 2014), and leucokinin (LK) (Cavey *et al.*,  
58 2016), whose receptor is related to the neurokinin receptors. DH44 neurons receive synaptic  
59 inputs from DN1 pacemaker neurons, and both DH44- and LK- neurons are required for proper  
60 locomotor activity rhythms under constant darkness (DD) conditions (also see Yurgel *et al.*,  
61 2018; Zawandala *et al.*, 2018). However, the connectivity by which these two groups of  
62 neuroendocrine neurons promote locomotor activity, and phase-restrict it to morning or evening  
63 times, is uncertain. The daily two-peak pattern of locomotor activity is different from the daily  
64 activity pattern of either LK neurons (which are more active in the evening - Cavey *et al.*, 2016),  
65 or that of DH44 neurons (which are more active in mid-day - Bai *et al.*, 2018). These  
66 observations suggest that robust circadian locomotor timing information is likely to utilize  
67 additional pre-motor regulatory centers. As a strategy, we reasoned that spontaneous activity  
68 patterns corresponding to the daily bimodal activity pattern could help identify critical pre-motor  
69 elements.

70 Robie *et al.* (2017) performed an unbiased screening of sparsely-labeled neuronal groups  
71 to determine which could initiate locomotor activity. By this analysis, the strongest candidates  
72 were the Ring Neurons of the Ellipsoid Body (EB-RNs) (Figure 1a). In parallel, silencing these  
73 same EB-RNs reduced spontaneous locomotor activity (Martín-Peña *et al.*, 2014). EB-RNs are a  
74 subset of neurons that constitute the Central Complex - the primary locomotor control center in



75 insects (Strauss and Heisenberg, 1993; Pfeiffer and Homberg, 2014). EB-RNs encode visual  
76 landmarks for visuospatial-memory-based orientation and navigation (Neuser *et al.*, 2008; Ofstad  
77 *et al.*, 2011; Seelig and Jayaraman, 2013). In the monarch butterfly, EB-RNs are involved in sun-  
78 compass navigation (Heinze and Reppert, 2010), which requires timing information from  
79 circadian clocks (Froy *et al.*, 2003). In *Drosophila*, EB-RNs might also be regulated by the  
80 neuropeptides LK (Cavey *et al.*, 2016) and the pigment-dispersing factor (PDF) (Pírez *et al.*,  
81 2013). Therefore, we first measured spontaneous activity in EB-RNs *in vivo*, to see if they  
82 represent a point of convergent circadian regulation that could lead to daily bouts of locomotor  
83 activity.

#### 84 **Spontaneous daily bimodal activity in EB-RNs *in vivo***

85 To test whether EB-RNs regulate circadian locomotor activity, we expressed tetanus  
86 toxin light chain (TeTn, Sweeney *et al.*, 1995) to block neurotransmission in the majority of ~60  
87 EB-RNs. As expected, the circadian rhythm of locomotor activity in these flies was impaired  
88 under DD, as was the general level of activity (Figure 1b and Extended Data Table 1). Therefore,  
89 to learn about the possible involvement of the EB-RNs in normal rhythmic locomotion (Figure  
90 1c), we then measured *in vivo* spontaneous activity exhibited by these neurons in otherwise wild-  
91 type flies. Using the genetically encoded calcium sensor GCaMP6s (Chen *et al.*, 2013), we  
92 performed *in vivo* Ca<sup>2+</sup> imaging in living flies for 24 hrs using methods previously described  
93 (Liang *et al.*, 2016, 2017). EB-RNs contains several genetically and morphologically distinct  
94 subgroups (Renn *et al.*, 1999a). We dissected four EB-RN subgroups using different genetic  
95 drivers that use regulatory sequences associated with different circadian clock-related genes: one  
96 with sequences from *timeless*, one from *cryptochrome*, and two from *pdfr* (*pigment-dispersing*  
97 *factor receptor*) (Figure 1d-g and Extended Data Figure 1a). In both 12-hr light: 12-hr dark (LD)

98 cycles and in constant darkness (DD) conditions, the four different EB-RN subgroups we tested  
99 displayed spontaneous, daily  $\text{Ca}^{2+}$  rhythms (Figure 1e-g). The average  $\text{Ca}^{2+}$  activity profile of  
100 each subgroup was bimodal (Hartigans' dip test, LD:  $p < 0.0001$ , DD:  $p < 0.05$ ), with a peak  
101 around dawn and another around dusk. These peaks corresponded to the times of day when flies  
102 showed daily locomotor activity peaks (Figure 1c). The outer subgroup of EB-RNs caused the  
103 strongest effects on locomotor activity according to Robie *et al.* (2017). We tested the same split-  
104 GAL4 drivers as reported by Robie *et al.* (2017) and found that these locomotion-promoting EB-  
105 RNs likewise displayed a similar spontaneous daily bimodal activity pattern (Extended Data  
106 Figure 1b; Hartigans' dip test,  $p < 0.0001$ ). We also confirmed the daily bimodal activity pattern  
107 exhibited by different EB-RN subgroups using a separate, circadian-clock-irrelevant driver line  
108 to label the majority of EB-RNs (Figure 1h; Hartigans' dip test, LD:  $p < 0.001$ , DD:  $p < 0.01$ ).

109 To directly test the correlation between EB-RN neural activity and locomotor activity in  
110 single flies in our experimental paradigm, we performed *in vivo* 24-hr  $\text{Ca}^{2+}$  imaging while  
111 simultaneously measuring spontaneous leg movements as a proxy for locomotor activity levels  
112 (Figure 2a). EB-RN activity was strongly correlated with such behavioral activity in individual  
113 flies, both at a daily time scale (Figure 2f-h) as well as at a shorter (hourly) time scale (Figure 2c-  
114 e). Analysis of the shorter timescale indicated that increases in EB-RN activity were coincident  
115 with increases in behavioral activity; decreases typically preceded decreases in behavioral  
116 activity by a few minutes (Figure 2E). Thus, EB-RNs, consistent with their documented roles as  
117 pre-motor activity centers, exhibit spontaneous daily neural activity rhythms that precisely  
118 correspond to the pattern of circadian locomotor rhythms.

119 **Circadian pacemaker neurons drive EB-RN activity rhythms**

120           The daily neural activity rhythms in EB-RNs could reflect rhythmic sensory inputs, either  
121 proprioceptive or visual. For example, recent studies suggest that EB-RNs encode self-motion  
122 information (Shiozaki & Kazama, 2017). Therefore, to block ascending proprioceptive sensory  
123 inputs, we transected connectives between the brain and ventral nerve cord (between  
124 subesophageal and first thoracic neuromeres) immediately before Ca<sup>2+</sup> imaging. EB-RNs still  
125 displayed normal bimodal activity rhythms (Figure 3a). These EB-RN rhythms persisted even  
126 when the entire body of the fly was removed immediately before imaging (Figure 3b).  
127 Therefore, spontaneous bimodal EB-RN activity rhythms are not a consequence of locomotor  
128 behavioral activity. Previous studies also showed that EB-RNs receive large-scale visual inputs  
129 (Seeling & Jayaraman, 2013; Omoto *et al.*, 2017; Sun *et al.*, 2017). We therefore removed visual  
130 inputs by testing flies in DD (Figure 1) or by testing genetically blind *norpA<sup>P24</sup>* mutant flies  
131 (Figure 3c): in both cases, normal EB-RN activity rhythms persisted. Together, these results  
132 demonstrate that EB-RN activity rhythms are not driven by daily rhythmic sensory inputs.

133           To determine if EB-RN activity rhythms are driven by molecular clocks, we measured  
134 Ca<sup>2+</sup> activity in circadian-defective *per<sup>01</sup>* (null) mutant flies (Konopka & Benzer, 1971), which  
135 fail to display circadian clock-dependent anticipatory behavior. Although *per<sup>01</sup>* flies still had two  
136 peaks of startle responses (to the lights-on and lights-off stimuli under LD cycles), daily Ca<sup>2+</sup>  
137 activity patterns in EB-RNs were arrhythmic (Figure 3d). Therefore, EB-RN activity rhythms  
138 specifically correlate with - and entirely depend on - circadian clock signals that regulate daily  
139 behavioral peaks. Notably, EB-RNs exhibit no measurable expression of the core clock gene  
140 *period*, which is highly expressed and cycling in circadian pacemaker neurons (Extended Data  
141 Figure 1c) (Kaneko and Hall, 2000). Furthermore, manipulations to alter the pace of circadian  
142 clocks in a subset of circadian neurons shifted the locomotor activity phases as previously

143 reported (Stoleru *et al.*, 2005; Yao and Shafer, 2014), while the same manipulation within EB-  
144 RNs did not affect locomotor behavior (Extended Data Figure 1d-f). Thus, we conclude that  
145 daily EB-RN activity rhythms are downstream of circadian timing information provided by  
146 circadian pacemaker neurons. To test whether circadian neurons regulate EB-RNs, we impaired a  
147 crucial signal within the pacemaker network, the neuropeptide PDF (Renn *et al.*, 1999b). In PDF  
148 receptor mutant (*pdf<sup>han5304</sup>*) flies, the EB-RNs activity pattern under LD transformed to a daily  
149 unimodal one (Hartigans' dip test,  $p=0.23$ ): the morning activity peak was lost, and the evening  
150 peak was advanced (Figure 3e; Watson-Williams test,  $p=0.00012$ ). This neural activity pattern  
151 mirrors the changes in locomotor activity pattern typically displayed by *pdf<sup>han5304</sup>* flies (Han *et*  
152 *al.*, 2005). Meanwhile, EB-RNs responded to thermogenetic and pharmacogenetic activation of  
153 PDF-releasing neurons (Extended Data Figure 2ab). Thus, EB-RN activity rhythms could be  
154 driven (directly or indirectly) by PDF-expressing circadian pacemaker neurons.

### 155 **Circadian neurons dictate phases of EB-RN activity**

156 In contrast to EB-RNs, all circadian pacemaker neurons showed single daily peaks of  
157 activity. This difference suggested that the daily two-peak activity pattern of EB-RNs could be  
158 generated by a combination of different circadian neuronal outputs. For example, M cells could  
159 drive a morning activity peak in EB-RNs while E cells could independently drive EB-RN  
160 evening activity. We found that EB-RNs responded to the selective activation of M cells (four s-  
161 LNv) by ATP application to brains expressing ATP-gated cation channel P2X2 (Lima and  
162 Miesenböck, 2005) in M cells (Figure 4a). A similar design to selectively activate E cells, the 5<sup>th</sup>  
163 s-LNv and three PDFR-positive LNd (Im and Taghert, 2011), produced correspondent EB-RN  
164 responses of comparable amplitude (Figure 4b and Extended Data Figure 2de). These results  
165 support the proposition that both M cells and E cells have functional connections with EB-RNs.

166 As a more stringent test, we then asked whether selectively accelerating M or E  
167 oscillators would selectively influence the phase of either the morning and/or evening peak of  
168 EB-RN Ca<sup>2+</sup> activity. Overexpressing Shaggy (SSG) using *pdf-GAL4* (PDF>SGG) to accelerate  
169 the molecular clocks selectively in Morning oscillators advanced the morning peak of locomotor  
170 activity (cf. [Stoleru et al., 2005](#)) and the M-cell activity peak (Figure 4de). In these flies, we  
171 found that only the morning peak of EB-RN Ca<sup>2+</sup> activity was phase-advanced, while their  
172 evening Ca<sup>2+</sup> peak phase was unaffected (Figure 4f-h). This result suggests that the morning  
173 peak of EB-RNs activity is dictated by the morning peak of M cell activity. We then in parallel  
174 asked whether the evening peak of EB-RNs is dictated by the evening peak of E cells.  
175 Overexpressing SGG in E cells by *dvpdf-GAL4* and *pdf-GAL80* (E-cell>SGG) advanced both  
176 morning and evening behavioral peaks in 12 hr light: 12 hr dark cycles (Extended Data Figure  
177 3), yet it selectively advanced the evening behavioral peak in a short-day condition (10 hr light:  
178 14 hr dark cycles; cf. [Stoleru et al., 2007](#)). Whether this results from the different  
179 photoentrainment conditions, or from faulty suppression of M cell activity by the GAL80  
180 element awaits further study. In short day, when the E-cell peak was selectively phase-advanced  
181 (Figure 4i-l), the evening peak of EB-RN Ca<sup>2+</sup> activity was selectively phase-advanced, and by  
182 comparable amplitude (Figure 4k-m). Taken together, these results reveal essential circuit links  
183 to demonstrate that M cells and E cells can independently dictate the two phases of EB-RN pre-  
184 motor activity.

### 185 **Dopaminergic neurons regulate EB-RNs**

186 None of the ~150 circadian pacemaker neurons in *Drosophila* project directly to the EB  
187 ([Helfrich-Förster, 2005](#)). We therefore asked through which interneurons M cells and E cells  
188 might regulate daily neural activity in EB-RNs. A set of two dopaminergic (DA) neurons (named

189 PPM3-EB) appeared as prominent candidates: they innervate the EB; further, they can initiate  
190 locomotor activity and promote ethanol-induced locomotor activity (Kong *et al.*, 2010). First we  
191 established that PPM3-EB neurons spontaneously displayed a daily bimodal neural activity  
192 pattern *in vivo* (Hartigans' dip test,  $p < 0.0001$ ), similar to that of the EB-RNs and similar to the  
193 profile of locomotor activity (Figure 5a). To study the precise relationship between activity in  
194 EB-RNs and that in PPM3-EBs in single fly brains, we employed dual-color  $Ca^{2+}$  imaging. This  
195 method separated  $Ca^{2+}$  activity signals from these two anatomically-overlapping neuron groups,  
196 by simultaneously recording a green signal (GCaMP6s) in PPM3-EB and a red signal (jGECO1a,  
197 Dana *et al.*, 2016) in EB-RNs (Figure 5b). We found that the spontaneous  $Ca^{2+}$  activity patterns  
198 of EB-RNs were highly correlated with those of PPM3-EB, but poorly correlated with those of  
199 the l-LN<sub>v</sub> circadian neurons, which were also labelled by jGECO1a (Figure 5c-f). This result  
200 suggests that PPM3-EB and EB-RNs are closely connected: they receive common inputs and/or  
201 one receive synapses from the other.

202 Furthermore, both PPM3-EB and EB-RNs responded to the bath-application of PDF and  
203 the pharmacogenetic activation of PDF neurons (Extended Data Figure 4ab). In response to the  
204 activation of PDF neurons, PPM3-EB responded more quickly than did EB-RNs, which is  
205 consistent with placing PPM3-EBs 'upstream' of EB-RNs. Indeed, EB-RNs also responded to  
206 the bath-application of dopamine (Extended Data Figure 4c) and to the activation of PPM3-EB  
207 (Extended Data Figure 4d). Together these results support a model in which circadian pacemaker  
208 neurons indirectly activate as many as ~60 pairs of EB-RNs by first activating two pairs of  
209 dopaminergic neurons, the PPM3-EB. We tested this model by blocking neurotransmission in  
210 PPM3-EB neurons, thereby asking if their specific output is necessary for proper locomotor  
211 rhythmicity. Using intersectional genetics (*GMR92G05-GAL4* and *TH-Flp*), we restricted the

212 expression of tetanus toxin (TeTn, [Sweeney et al., 1995](#)) to the two pairs of PPM3-EB. The  
213 locomotor activity of these flies was largely arrhythmic under DD (Figure 5gh). This behavioral  
214 deficit was comparable with, and even more severe than that caused by blocking  
215 neurotransmission in the majority of EB-RNs (Figure 1b and Extended Data Table 1).  
216 Importantly, while the molecular clocks and Ca<sup>2+</sup> rhythms of circadian pacemaker neurons in  
217 these flies were intact, the daily bimodal neural activity pattern of EB-RNs was severely  
218 impaired (Extended Data Figure 5 and Figure 5ij). Likewise, knocking down DA receptors  
219 DopR2 or D2R in the majority of EB-RNs also impaired rhythmicity in locomotor activity under  
220 DD (Figure 5k and Extended Data Table 1). Hence we propose that dopaminergic input from  
221 PPM3-EB neurons forms a critical relay to instruct EB-generated locomotor activity according to  
222 a multi-phasic circadian schedule.

## 223 **Discussion**

224 Locomotor activity in *Drosophila* follows a daily bimodal rhythm that peaks around  
225 dawn and again around dusk. By measuring spontaneous neural activity *in vivo* across the 24 hr  
226 day, we found that morning and evening circadian oscillators independently activate the pre-  
227 motor Ring Neurons of the Ellipsoid Body through the agency of PPM3-EB dopaminergic  
228 neurons. These findings provide the most detailed insights available in any model system by  
229 which pre-motor pathways are organized in response to phasic circadian pacemaker information.  
230 In addition, they indicate an unexpectedly obligate role for dopamine in the neural control of  
231 daily rhythmic locomotor activity. We based our conclusions on four lines of evidence: (1) Both  
232 PPM3-EB and EB-RNs display daily spontaneous bimodal neural activity patterns that precisely  
233 correlate with locomotor activity patterns peaking around dawn and dusk (Figure 1 & 5a). (2)  
234 Locomotor activity closely followed changes in EB-RN activity (Figure 2) while EB-RN activity



235 was itself highly correlated with PPM3-EB activity (Figure 5b-f). (3) Different phases of EB-RN  
236 circadian-rhythmic neural activity relied on independent inputs from circadian pacemakers, M  
237 cells and E cells, but did not rely at all on visual inputs or on the execution of locomotor  
238 behavior (Figure 3 and 4). (4) Both EB-RN activity rhythms and normal locomotor activity  
239 rhythms required PPM3-EB inputs (Figure 5g-j); normal locomotor activity rhythms also  
240 required DA receptors on EB-RNs to receive inputs from PPM3-EB DA neurons (Figure 5k).  
241 These data together support a model that features outputs from M cells and E cells sequentially  
242 and independently generating the two daily peaks of activity PPM3-EB DA neurons. These non-  
243 circadian PPM3-EB DA neurons in turn relay the phasic information to activate as many as ~60  
244 pairs of EB-RNs, thereby generating the bimodal daily locomotor activity rhythm (Figure 5l).

245 Our findings constitute important steps in relating the activities of distinct circadian  
246 pacemaker neurons to downstream neural circuits. Selcho et al. (2017) recently described  
247 circadian pacemaker control of a peripheral clock in *Drosophila* to control steroid hormone  
248 secretion and, whose titres gate subsequent adult emergence (eclosion). In that output pathway,  
249 s-LNv activate the peptidergic PTTH neurons, which in turn activate the peripheral Prothoracic  
250 Gland. With respect to locomotor behavior, we found that M (s-LNv) cells and E (LNd)  
251 oscillators independently control the morning and evening neural activity phases in EB-RNs  
252 (Figure 4). Two recent studies linked a different subset of circadian pacemakers (DN1s) to  
253 subgroups of EB-RNs, via subsets of neurons in the Anterior Optic Tubercle (Lamaze et al.,  
254 2018; Guo et al., 2018). By manipulating activity in this pathway, both groups found effects on  
255 the balance between sleep and wake states. Thus, increasing lines of research indicate circadian-  
256 and sleep-regulating circuits impart timing information to govern behavior through the classic  
257 pre-motor centers of the Central Complex.



258 Previous studies in flies and mice have shown that DA modulates circadian pacemaker  
259 circuits (Chang *et al.*, 2006; Grippo *et al.*, 2017; Hirsh *et al.*, 2010; Klose *et al.*, 2016; Langraf *et*  
260 *al.*, 2016; Shang *et al.*, 2011, 2013). Our findings here show that circadian pacemaker neurons  
261 also regulate DA neuron activity. DA neurons responded to circadian neuron outputs (Extended  
262 Data Figure 4ab) and showed spontaneous circadian neural activity rhythms that were correlated  
263 with behavior (Figure 5a). These findings correspond to earlier studies in mammals showing that  
264 circadian rhythms in DA neuron activity, and in striatal DA content, are dependent on master  
265 circadian pacemaker neurons in the suprachiasmatic nuclei (SCN) (Smith *et al.*, 1992; Sleipness  
266 *et al.*, 2006; Luo *et al.*, 2008; Fifel *et al.*, 2018). Deficits of DA neurons in patients and in animal  
267 models of Parkinson's disease caused dysregulation of circadian locomotor activity patterns and  
268 of sleep (Videnovic and Golombek, 2017). Consistent with our model, a DA-deficient mouse  
269 model displays dampened and fragmented locomotor activity rhythms, yet possesses normal  
270 SCN molecular clocks (Taylor *et al.*, 2009; Kudo *et al.*, 2011). It remains to be determined  
271 whether DA in mammals, as in *Drosophila*, represents the critical agent by which circadian  
272 outputs activate pre-motor centers to adaptively schedule locomotor activity.

273 The effects of DA to organize proper circadian control of locomotor behavior may be  
274 related to its well documented effects in *Drosophila* to promote arousal, especially forms of  
275 arousal associated with changes in sleep and circadian rhythm states (Andretic *et al.*, 2005;  
276 Birman, 2005; Kume *et al.*, 2005; Lima and Miesenbock, 2005; Lebestky *et al.*, 2009; Liu *et al.*,  
277 2012). A recent study suggests that PDF signals from circadian neurons promotes wakefulness  
278 by suppressing daytime activity in the PPM3 DA neurons (Potdar and Sheeba 2018). However,  
279 we favor an alternative model which is based on the results described above, including both  
280 manipulations of PPM3 physiology as well as measurements of normal PPM3 24-hr activity

281 patterns *in vivo*. We propose PPM3-DA neurons promote wakefulness and locomotor activity in  
282 the morning by excitation from the M oscillators, and perhaps directly by PDF.

283 Our results suggest that a major influence of circadian timing signal on locomotor  
284 activity is in the Central Complex (CX), the decision-making circuit that dictates the balance  
285 between locomotion and rest. Within the CX, EB neurons transform sensory inputs into goal-  
286 directed motor outputs (Sun *et al.*, 2017; Shiozaki and Kazama, 2017). The final motor output is  
287 subject to many signals reflecting the internal state: for example, hunger signals transmitted  
288 through the leucokinin-expressing neurons promote locomotor activity (Yurgel *et al.*, 2018;  
289 Zandawala *et al.*, 2018). Here, we propose that the circadian system promotes locomotor activity  
290 in the dawn and dusk episodes by increasing the probability of the EB-RNs to favor activity over  
291 rest. A similar action on EB-RNs appears to underlie sleep promotion by dorsal fan-shaped body  
292 (dFSB) neurons (Donlea *et al.*, 2017). dFSB neurons effectively suppress sensory-triggered  
293 movements by inhibiting EB-RNs via helicon cells and thereby instigate less activity and more  
294 rest. Thus, sleep and circadian signaling antagonistically converge on the EB-RN system to  
295 influence the level of motor output.

296 In addition to motor outputs, parts of EB circuit also signal the sleep drive: Liu *et al.*  
297 (2016) showed that a subgroup of EB-RNs, R2 (called R5 by Omoto *et al.*, 2017) registers sleep  
298 debt and thereby constitutes an integral part of the sleep homeostat mechanism. How can this be  
299 reconciled with our finding that the EB-RNs (including R2s) exhibit neural activity in concert  
300 with locomotor behavior? We propose that, because the level of locomotor activity is directly  
301 encoded by EB-RN activity, a subgroup of them (R2s) incorporates the amount of locomotor  
302 activity along with duration of wakefulness to help generate sleep drive. Therefore, although  
303 they receive common circadian pacemaker and DA inputs, and although they exhibit common

304 activation periods at dawn and at dusk, different subgroups of EB-RNs likely have specialized  
305 downstream functions in behavioral control.

306 **Figure legends**

307 **Figure 1. Daily bimodal neural activity patterns of EB ring neurons.** (a) The ellipsoid body  
308 ring neurons (EB-RNs) in the fly brain. (b) Average rhythm strength (power) of locomotor  
309 activity for 9 days under constant darkness (DD) of control and flies with TeTn expressed in EB-  
310 RNs; asterisk denotes significant differences compared to control ( $P < 0.0001$ , Mann-Whitney  
311 test). (c) The average locomotor activity histogram and phase distributions of behavioral peaks of  
312 wild type *R56H10-GAL4/GCaMP6s* flies (left) under 12-hr light: 12-hr dark (LD) cycle and  
313 (right) in the first day under DD ( $n = 16$  flies). Dots indicate SEM. (d-h) Daily  $Ca^{2+}$  activity  
314 patterns of the EB ring neuron subgroups: (d) R1 labelled by *tim-GAL4*, (e) R2 labelled by *cry-*  
315 *lexA*, (f) R3 labelled by *pdf(F)-GAL4*, (g) R4 labelled by *R19H08(pdf)-lexA*, and (h) R1-4  
316 labelled by *R56H10-GAL4*. Left, confocal images of EB ring neurons and diagrams of their  
317 concentric arborization radii; scale bars, 25  $\mu$ m. Middle and Right, average  $Ca^{2+}$  transients and  
318  $Ca^{2+}$  phase distribution for both morning peaks (orange dots and arrow) and evening peaks (blue  
319 dots and arrow). Middle - under LD; Right - under DD.

320

321 **Figure 2. EB ring neuron activity is correlated with locomotor activity.** (a) Illustration of  
322 long-term *in vivo* imaging with infrared measurement of locomotor activity (see Methods). (b)  
323 Map of the major circadian neuron groups and EB ring neurons. (c) Representative recordings of  
324 two flies: bars, normalized locomotor activity counts per 10 m; blue traces,  $Ca^{2+}$  activity of EB-  
325 R2 neurons in the same fly. (d-e) Average locomotor activity (black) and  $Ca^{2+}$  activity (blue)  
326 aligned by (d) increasing phase and (e) decreasing phase of  $Ca^{2+}$  activity. The averaged phase  
327 lags were calculated by cross-correlation: (c)  $0.35 \pm 7$  min; (d)  $-15 \pm 0.5$  min. (f-h) Average

328 locomotor activity (f) and average  $\text{Ca}^{2+}$  transients of (g) EB-R2 neurons and (h) circadian  
329 pacemaker neurons in the same flies (n = 6 flies). Dots and shading indicate SEM.  
330  
331 **Figure 3. EB ring neuron rhythms are driven by clocks, not in response to behavior or**  
332 **sensation. (a)** Daily  $\text{Ca}^{2+}$  activity patterns of (middle) EB-R2 neurons and (right) circadian  
333 neurons under LD immediately after cutting the connectives between brain and ventral nerve  
334 cord (n = 10 flies). **(b)** Daily  $\text{Ca}^{2+}$  activity patterns of EB-R2 and circadian neurons under LD  
335 immediately after removing the bodies (n = 6 flies). **(c)** In blind *norpA<sup>P24</sup>* mutant flies, (left)  
336 average locomotor activity (n = 22 flies) and daily  $\text{Ca}^{2+}$  activity patterns (middle) of EB-R2  
337 neurons and (right) circadian neurons under LD (n = 6 flies). **(d)** In *per<sup>01</sup>* mutants, average  
338 locomotor activity (n = 16 flies) and arrhythmic  $\text{Ca}^{2+}$  activity patterns of EB-R2 and of circadian  
339 neurons under LD (n = 7 flies). **(e)** In *pdf<sup>han5304</sup>* mutants, average locomotor activity (n = 8 flies)  
340 and  $\text{Ca}^{2+}$  activity patterns of EB-R2 and of circadian neurons under LD (n = 7 flies).

341  
342 **Figure 4. Daily activity phases of EB-RNs are dictated by M and E cells. (a)** Illustration and  
343 averaged response traces of M cells (s-LNv) and EB-R2 neurons to ATP application in flies with  
344 P2X2 expressed in M cells (n = 6 flies). **(b)** Illustration and averaged response traces of E cells  
345 (three LNd and the 5<sup>th</sup> s-LNv neurons) and EB-R2 neurons to ATP application in flies with P2X2  
346 expressed in E cells (n = 5 flies). **(c)** Maximum  $\text{Ca}^{2+}$  changes of EB-R2 after ATP application in  
347 (a), (b), and control (n = 3 flies). **(d)** Average locomotor activity in DD1 of (top) wild type (WT,  
348 n = 16 flies) and (bottom) flies expressing SGG in PDF neurons (PDF>SGG, n = 24 flies). **(e)**  
349 Phases comparisons of morning and evening activity between WT and PDF>SGG. Note that  
350 only the morning activity phase was advanced (\* P < 0.05, Watson-Williams test). **(f-g)** Daily

351  $\text{Ca}^{2+}$  activity patterns of (left) circadian neurons and (right) EB-R2 neurons (c) in WT flies under  
352 DD (n = 12 flies) and (d) neurons in PDF>SGG flies under DD (n = 6 flies). (h) Phase  
353 comparison of each circadian neuron group and for both morning peaks (orange) and evening  
354 peaks (blue) of EB-R2 neurons between WT and PDF>SGG flies. Note that only M cells (s-  
355 LNV) and the morning peak of EB-R2 were significantly advanced in PDF>SGG. (i) Average  
356 locomotor activity of (top) WT (n = 13 flies) and (bottom) flies expressing SGG in E cells (E-  
357 cells>SGG, n = 16 flies) in DD1 after 5 cycles of 10 h light: 14 h dark (short day, SD). (j) Phase  
358 comparisons of morning and evening activity between WT and E-cell>SGG. Note that only  
359 evening activity phases were significantly advanced. (k-l) Daily  $\text{Ca}^{2+}$  activity patterns and phase  
360 comparisons of (left) circadian neurons (PDF neurons were invisible due to *pdf-GAL80*) and  
361 (right) EB-R2 neurons in (k) WT and (l) E-cells>SGG flies after SD entrainment (n = 5 flies). s-  
362 LNV and l-LNV were invisible due to *pdf*. (m) E cells (LNd) and the evening peak of EB-R2  
363 were significantly advanced in E-cells>SGG flies compared to WT ones.

364

365 **Figure 5. PPM3-EB and EB-RNs constitute a circadian output motor circuit.** (a) Daily  
366 bimodal  $\text{Ca}^{2+}$  activity patterns of PPM3-EB under LD and DD (n = 6 and 6 flies). (b) Illustration  
367 of dual-color  $\text{Ca}^{2+}$  imaging: GCaMP6s in PPM3-EB and jRGECO1a in EB-R2 and circadian  
368 neurons. (c) Example traces of  $\text{Ca}^{2+}$  activity in EB-R2, PPM3-EB, and l-LNV neurons (sampling  
369 rate, 1Hz). (d) Average  $\text{Ca}^{2+}$  activity traces from (c) aligned by (left) PPM3-EB peak and (right)  
370 l-LNV peak. (e) As in (d), average  $\text{Ca}^{2+}$  activity traces from all flies (n = 8 flies). (f) Correlation  
371 of  $\text{Ca}^{2+}$  activity (Pearson's r) between EB and PPM3 is considerably stronger than that between  
372 EB and l-LNV (p=0.0009, paired t-test after Fisher's Z-transform). (g) Group-averaged actograms  
373 of control (left) and flies expressing tetanus toxin (TeTn) in PPM3-EB neurons to block

374 neurotransmission (right). **(h)** Average rhythm strength (power) of genotypes in (g) for 9 days  
375 under DD; asterisk denotes significant differences compared to control ( $P < 0.0001$ , Mann-  
376 Whitney test). **(i-j)** Daily  $\text{Ca}^{2+}$  activity patterns of circadian neurons (top) and EB-R2 neurons  
377 (bottom) under DD1 in (i) WT ( $n = 6$  flies) and (j) flies with TeTn expressed in PPM3-EB  
378 neurons ( $n = 6$  flies). **(k)** Average rhythm strength (power) of genotypes for 9 days under DD in  
379 which DA receptors are knocked down in EB-RNs using *R56H10-GAL4*; asterisk denotes  
380 significant differences compared to control ( $P < 0.05$ , Kruskal-Wallis test followed by post hoc  
381 Dunn's tests). **(l)** Model of the circadian output pathway for locomotor activity rhythms:  
382 circadian pacemaker M cells and E cells independently activate EB-RN pre-motor circuits  
383 around dawn and dusk through the relay of PPM3-EB dopaminergic neurons.

384

### 385 **Extended Data Figure Legends**

386 **Extended Data Figure 1. The different subgroups of ellipsoid body (EB) ring neurons do**  
387 **not display circadian pacemaker cell properties.** **(a)** Confocal images of different subgroups  
388 of EB ring with different concentric arborization radii featured by different genetic drivers: the  
389 *cry-LexA* pattern did not overlap with that the *pdf(F)-GAL4* pattern; the *cry-LexA* pattern did  
390 not overlap with the *pWF22-6* pattern (R4d subgroup, see [Renn et al., 1999](#)); the  
391 *GMR19C08(pdf)-lexA* pattern did not overlap with the pattern of *pWF22-6*; the *cry-LexA* pattern  
392 did overlap with the that of *GMR69F08-GAL4* (R2 subgroup, see [Liu et al., 2016](#)); Scale bars, 20  
393  $\mu\text{m}$ . **(b)** Daily  $\text{Ca}^{2+}$  activity patterns of the EB-RN subgroup R4, labelled by split-GAL4 drivers  
394 which caused the strongest effect on increasing locomotor activity ([Robie et al., 2017](#)). **(c)**  
395 Immunostaining of PER protein in the *cry-LexA*, *LexAop-GCaMP6s* fly at ZT0. Scale bars, 20  
396  $\mu\text{m}$ . PER can be detected in circadian pacemaker neurons, but not in EB-RNs. **(d-f)** Average

397 locomotor activity of (d) wild type (WT, n = 16 flies), (e) flies with Shaggy (SGG) expressed in  
398 s-LNv and three out of six LNd with *pdfr(B)-GAL4* (n = 16 flies), and (f) flies with SGG  
399 expressed in EB-R3 neurons with *pdfr(F)-GAL4* (n = 32 flies) under LD cycles and in the first  
400 day under DD (DD1). Accelerating molecular clocks in M and E cells (e) advanced both morning  
401 and evening behavioral phases, yet SGG over-expression in EB-RN neurons (f) was  
402 inconsequential.

403

404 **Extended Data Figure 2. EB-RNs respond to circadian neuron activation.** (a) Left, map of  
405 EB-RNs and circadian pacemaker neurons. Right, average traces of EB-R3 neurons responding  
406 to increase of temperature in flies with dTrpA1 expressed in PDF neurons (red, n = 7 flies) and in  
407 control flies without dTrpA1 expression (blue, n = 4 flies). Red aspect indicates duration of  
408 temperature increase. (b) Responses of EB-RNs labelled by *R56H10-GAL4* to ATP application in  
409 flies with P2X2 expressed in PDF neurons (left, n = 5 flies) and in control flies without P2X2  
410 expression (right, n = 3 flies). Red aspect indicates duration of ATP application. Above, example  
411 image baseline Ca<sup>2+</sup> signal and maximum Ca<sup>2+</sup> signal changes. Below, average traces of EB ring  
412 neurons. (c) Maximum Ca<sup>2+</sup> signal changes after ATP application in individual EB-RNs in (b).  
413 (d) Responses of EB-R2 neurons, and circadian pacemaker neurons labelled by *cry-LexA*, to ATP  
414 application in flies with P2X2 expressed in s-LNv (left, n = 6 flies). (e) Responses of EB-R2  
415 neurons and circadian pacemaker neurons labelled by *cry-LexA* to ATP application in flies with  
416 P2X2 expressed in E cells: three LNd and the 5<sup>th</sup> s-LNv neurons (left, n = 5 flies) and (f) in  
417 control flies without P2X2 expression (right, n = 3 flies).

418



419 **Extended Data Figure 3. Daily activity phases of output circuits are dictated by different**  
420 **groups of circadian neurons. (a)** Average locomotor activity in DD1 of flies expressing SGG in  
421 E pacemaker neurons, entrained under 12hr light: 12hr dark cycles (E-cells>SGG, n = 8 flies).  
422 **(b)** Phases comparisons between WT and E-cells>SGG flies. Note that both morning and  
423 evening activity phases were advanced (Watson-Williams test). **(c)** Daily Ca<sup>2+</sup> activity patterns of  
424 (left) circadian pacemaker neurons and (right) EB-R2 neurons in E-cells>SGG flies under DD (n  
425 = 5 flies). **(d)** Phase comparisons of circadian pacemaker neurons between WT and E-  
426 cells>SGG. E cells (LNd) were shifted in E-cells>SGG. **(e)** Both the morning peak and the  
427 evening peak of EB-R2 were shifted in E-cells>SGG (\*p < 0.05, Watson-Williams test).

428

429 **Extended Data Figure 4. Tests of connections from PDF neurons to PPM3-EB and to EB-**  
430 **RNs. (a)** Above, map of PPM3-EB DA neurons, EB-RNs, and circadian pacemaker neurons.  
431 Below-left, average traces of PDF neurons, PPM3-EB neurons, and EB-R1 neurons responding  
432 to activation of P2X2-expressing PDF neurons by ATP at two zeitgeber time points: ZT1 (n = 5  
433 flies) and ZT12 (n = 4 flies). Below-right, response latency (onset time constant) of EB-RNs is  
434 longer than that of PPM3-EB neurons (p=0.0029, Mann-Whitney test). **(b)** As in Figure 5b-f,  
435 dual-color Ca<sup>2+</sup> imaging: GCaMP6s in PPM3-EB and jRGECO1a in EB-R2 and circadian  
436 pacemaker neurons. Below-left, average traces of PPM3-EB neurons, EB-R2 neurons, and  
437 circadian pacemaker neurons responding to the bath-application of neuropeptide PDF (10<sup>-5</sup> M) at  
438 two zeitgeber time points: ZT0 (n = 3 flies) and ZT6 (n = 3 flies). Below-right, maximum Ca<sup>2+</sup>  
439 signal changes in individual cells after PDF bath application. **(c)** Average traces of EB-RNs  
440 responding to the bath-application of dopamine (10<sup>-4</sup> M) at ZT6 (n = 4 flies). **(d)** Average traces  
441 of EB-R2 neurons, and circadian pacemaker neurons labelled by *cry-LexA*, responding to

442 activation of P2X2-expressing PPM3-EB DA neurons by ATP (n = 5 flies). Red aspect indicates  
443 duration of drug application. Error bars denote SEM.

444

445 **Extended Data Figure 5. PER protein rhythms of control flies and flies expressing tetanus**

446 **toxin (TeTn) in PPM3-EB neurons in Figure 5G. (a)** Representative images of

447 immunostaining against PDF and PER at two different time points: ZT0 and ZT12 of flies

448 expressing TeTn in PPM3-EB. **(b)** Quantification of PER protein staining intensity at four

449 different time points in five groups of circadian neurons from control flies and flies expressing

450 TeTn in PPM3-EB (n > 3 flies for each time points).

451

452 **Extended Data Table 1. Manipulation of dopamine signaling impairs circadian locomotor**

453 **activity rhythms.** AR, arrhythmic. Period and power are calculated by  $\chi^2$  periodogram. Activity

454 represents averaged activity count per 30 min.

455

456 **Extended Data Table 1. List of driver/ reporter lines used in this study.** The nomenclature of

457 ellipsoid body ring neuron (EB-RN) subgroups used in this study – different from that in Omoto

458 *et al.* (2017) - are here indicated.

## 459 **Methods**

460 **Data reporting.** No statistical methods were used to predetermine sample sizes. The selection of  
461 flies from vials for imaging and behavioral tests were randomized. The investigators were not  
462 blinded to fly genotypes.

463 **Fly stocks.** Flies were reared on standard cornmeal/agar food at room temperature. Before  
464 imaging experiments, flies were entrained under 12 h light: 12 h dark (LD) cycles at 25°C for at  
465 least 3 days or under 10 h light: 14 h dark (short day, SD) cycles at 25°C for at least 5 days.

466 The following fly lines were previously described: *tim(UAS)-GAL4* (Blau & Young 1999),  
467 *pdf<sup>r</sup>(F)-GAL4* and *pdf<sup>r</sup>(B)-GAL4* (Im & Taghert 2011), *GMR56H10-GAL4* (Sun *et al.*, 2017),  
468 *GMR69F08-GAL4* (Liu *et al.*, 2016), *dvpdf-GAL4* (Bahn *et al.*, 2009); split-GAL4 lines:  
469 GMR\_MB122B and GMR\_SS00681 (Liang *et al.*, 2017), GMR\_SS002769 (Robie *et al.*, 2017);  
470 *cry-LexA* (Liang *et al.*, 2017), *pdf-LexA* (Shang *et al.*, 2008); *TH-Flp* (Xie *et al.*, 2018), *pdf-*  
471 *GAL80* (Stoleru *et al.*, 2004); *UAS-SGG* (Martinek *et al.*, 2001), *UAS-P2X2* and *LexAop-P2X2*  
472 (Yao *et al.*, 2002), *LexAop-jGECO1a* (Dana *et al.*, 2016), *UAS-GCaMP6s* and *LexAop-*  
473 *GCaMP6s* (Chen *et al.*, 2013), *UAS-DopR1-miRNA* and *UAS-DopR2-miRNA* (Liu *et al.*, 2017),  
474 *UAS-D2R-miRNA* and *UAS-DopEcR-miRNA* (Xie *et al.*, 2018); *per<sup>01</sup>* (Konopka & Benzer 1971),  
475 *norpA<sup>P24</sup>* (Ostroy & Pak 1974) and *pdf<sup>han5403</sup>* (Hyun *et al.*, 2005).

476 *UAS-(FRT.stop)-TeTn* (BL67690), *GMR19C08-LexA* (BL52543), *GMR56H10-GAL4*  
477 (BL61644), and *GMR92G05-GAL4* (BL48416) were obtained from Bloomington Stock Center.

478 The *cry-LexA* line was a gift from Dr. F Rouyer (CNRS Gyf, Paris).

479 **Nomenclature.** The nomenclature of ellipsoid body (EB) subgroups in this study follows Renn  
480 *et al.*, (1999a), which was revised by Omoto *et al.*, (2017) reflecting the introduction of more  
481 specific driver lines. The EB subgroup labelled by *cry-lexA* and *GMR69F08-GAL4* (also see Liu

482 *et al.*, 2016) was called R2, they were re-named R5 by *Omoto et al.* (2017). The EB subgroup  
483 labelled by *GMR19C08(pdfr)-lexA* was called R4, they were re-named R2 by *Omoto et al.*  
484 (2017).

485 ***In vivo fly preparations.*** The surgical procedure for *Drosophila in vivo* calcium imaging  
486 followed methods described in *Liang et al.*, (2016, 2017). Following CO<sub>2</sub> anesthetization, flies  
487 were mounted by inserting the neck into a narrow cut in an aluminum foil base. Thus, the foil  
488 permitted immersion of the head by saline during preparatory surgery and *in vivo* imaging, while  
489 the body remained in an air-filled enclosure. To access circadian pacemaker neurons on one side  
490 of the head, a single antenna, a portion of the dorso-anterior head capsule, and a small part of one  
491 compound eye were removed from the side ipsilateral to imaging. To access EB-RNs, both  
492 antennae and a portion of the dorso-anterior head capsule were removed, while the compound  
493 eyes remained intact. The entire surgery was typically ~15 min in duration. For experiments that  
494 entailed transection of connectives, or removal of the entire body, the surgery was conducted  
495 with fine forceps prior to brain-exposing surgery. The wounds were then closed by application of  
496 a bio-compatible silicone adhesive (Kwik-Sil, WPI, USA).

497 ***In vivo calcium imaging.*** Imaging was conducted with custom Objective Coupled Planar  
498 Illumination (OCPI) microscopes (*Holekamp et al.*, 2008), as described in *Liang et al.*, (2016,  
499 2017). Briefly, OCPI uses a cylindrical lens to generate a ~5µm thick light sheet, which was  
500 coupled to the focal plane of the objective. For 24-hr imaging, the objective coupled light sheet  
501 was scanned across the fly brain through the cranial window every 10 min to capture stacks of  
502 images. Each stack contained 20 to 40 separate images with a step size of 5 to 10 microns. For  
503 each image, exposure time was not more than 0.1 s. During 24-hr imaging, fresh hemolymph-  
504 like saline (HL3; 5 mM KCl, 1.5 mM CaCl<sub>2</sub>, 70 mM NaCl, 20 mM MgCl<sub>2</sub>, 10 mM NaHCO<sub>3</sub>, 5

505 mM trehalose, 115 mM sucrose, and 5 mM HEPES; pH 7.1) was perfused continuously (0.1-0.2  
506 mL/min). Light-dark cycle stimulation during *in vivo* calcium imaging was delivered using a  
507 white Rebel LED (Luxeon) controlled by an Arduino UNO board (Smart Projects, Italy) as  
508 described in [Liang et al., \(2017\)](#). For short term high-frequency imaging, image stacks were  
509 captured every 10 s (Extended Data Figure 2a and 4b), every 2 s (Figure 4a, Extended Data  
510 Figure 2b-f and 3cd), or every 1 s (Figure 5c-f and Extended Data Figure 3a). For each image,  
511 exposure time was not more than 0.04 s. For pharmacological tests, each fly was treated once.  
512 After 1 or 5-min baseline recordings, 1mL of 0.1 mM PDF solution, 1 mM dopamine solution,  
513 or 10 mM ATP solution (pH adjusted to 7) was manually added to a 9 mL static HL3 bath over a  
514 ~2 s period. PDF was purchased from Neo-MPS (San Diego, CA, USA) at a purity of 86%.

515 **Locomotor monitoring during imaging.** During 24-hr *in vivo* calcium imaging, *Drosophila*  
516 locomotor activity was measured by an infrared detector (LTE-301)/emitter (940nm, LTE-302)  
517 circuit. The infrared emitter was aimed toward the body of the fly and the detector received the  
518 infrared light transmitted through the fly (shown in Figure 2a). Both the body and leg movements  
519 can cause changes in transmitted light intensity. The analog signal from the infrared detector was  
520 transmitted through an Arduino UNO board with 100Hz sampling rate. The infrared emitter was  
521 shut off for 10 seconds every 10 min, allowing the microscope to acquire complete volume brain  
522 scans. The daily fly locomotor activity pattern was then calculated by counting the activity  
523 events within each 10-min bin. The activity events were identified by time-points when the  
524 infrared detector signal was out of the range for standard deviation by 3-fold. Then the  
525 normalized event count trace was aligned with the EB-R2 neuron calcium signal of the same fly  
526 (Figure 2c). The Pearson's correlation coefficient between these two signals was calculated. To  
527 test their correlation at an hourly time scale, these two signals then were averaged by a method

528 similar to spike-triggered averaging. 4-hr windows (1 hr before and 3 hr after the trigger point)  
529 of calcium signals were aligned by the local maximum (increasing phase) or local minimum  
530 (decreasing phase) of calcium signal derivatives. The locomotor signals occurring in these 4-hr  
531 windows were then averaged. Analysis was performed using R 3.3.3.

532 **Locomotor activity.** To examine the circadian rhythms of locomotor activity, individual flies  
533 was monitored using Trikinetics *Drosophila* Activity Monitor (DAM) system for 6 days under  
534 light-dark (LD) cycles and then for 9 days under constant darkness (DD) condition.  $\chi^2$   
535 periodogram with a 95% confidence cutoff and SNR analysis were used to measure circadian  
536 rhythmicity and periodicity (Levine *et al.*, 2002). Arrhythmicity were defined by a power value  
537 ( $\chi^2$  power at best period) less than 10, width lower than 1, a period less than 18 hrs or more than  
538 30 hrs. To find the phases of morning and evening peaks, each 24-hr day was split into two  
539 halves. For LD, it was split at ZT6. For DD1, it was split at the time of the manually selected  
540 midday “siesta”. Then the morning peak and evening peak were then determined by the  
541 maximum activity in each half.

542 **Immunocytochemistry.** Immunostaining for PER and  $\beta$ -Gal followed previous descriptions  
543 (Liang *et al.*, 2016). Briefly, fly brains were dissected in ice-cold, calcium-free saline and fixed  
544 for 15m in 4% paraformaldehyde containing 7% picric acid (v/v) in PBS. Primary antibodies  
545 included rabbit anti-PER (1:5000; kindly provided by Dr. M. Rosbash, Brandeis Univ.;  
546 Stanewsky *et al.*, 1997) and mouse anti- $\beta$ -galactosidase (1:1000; Promega, Madison, WI, Cat.  
547 #Z3781, Lot #149211). Secondary antisera were Cy3-conjugated (1:1000; Jackson  
548 Immunoresearch, West Grove, PA). Images were acquired on the Olympus FV1200 confocal  
549 microscope. PER protein immunostaining intensity was measured in ImageJ-based Fiji  
550 (Schindelin *et al.*, 2012).

551 **Imaging data analysis.** Calcium imaging data analysis was as described previously (Liang *et al.*,  
552 2016, 2017). Images were acquired by a custom software, Imagine (Holekamp *et al.*, 2008) and  
553 processed in Julia 0.6 including non-rigid registration, alignment and maximal projection along  
554 z-axis. Then ImageJ-based Fiji was used for rigid registration and to manually select regions of  
555 interest (ROIs) over individual cells or groups of cells. Average intensities of ROIs were  
556 measured through the time course and divided by average of the whole image to subtract  
557 background noise. For spontaneous calcium transients, each time trace was then calculated as  
558  $dF/F=(F-F_{\min})/F_{\text{mean}}$ . For 24-hr time traces, traces of certain cell type ROIs were first aligned,  
559 based on Zeitgeber Time and averaged across different flies. Hartigans' dip test and Silverman's  
560 test were used to testify whether the averaged 24-h time traces are unimodal or bimodal  
561 (Hartigan & Hartigan, 1985; Silverman, 1981). The phase relationship between traces was  
562 estimated by cross-correlation analysis. The 24-hr-clock circular plot of phases reflected both  
563 mean peak time and phase relationships of the same cell-group traces from different flies. For  
564 neurons with daily bimodal patterns (EB-RNs and PPM3-EB DA neurons), each trace was split  
565 into two parts: ZT18-ZT6 (morning) and ZT6-ZT18 (evening) to estimate the morning and  
566 evening peak phases respectively. For dual-color imaging traces, all signals were filtered (high-  
567 pass, 1/30 Hz). To 'spike'-triggered average simultaneous traces of three cell types (Figure 5de),  
568 the peaks of selected cell-type signal were identified by the local maximum of that signal after a  
569 low-pass filter (0.2Hz). Unfiltered signals of three cell types were then aligned by these peaks to  
570 calculate the averaged traces for individual cell types. For pharmacological calcium responses,  
571 each time trace was normalized by the initial intensity ( $F/F_0$ ). The maximum change was  
572 calculated by the maximum difference of normalized intensities between baseline and after drug  
573 application. The latency (onset time constant) was calculated by the duration from drug

574 application to the time when the trace reached 63.2% of maximum change. All statistics tests are  
575 two-sided. Trace analysis and statistics were performed using R 3.3.3 and Prism 7 (GraphPad,  
576 San Diego CA).



577 **References**

- 578 Andretic R, van Swinderen B, Greenspan RJ. (2005) Dopaminergic modulation of arousal in  
579 *Drosophila*. *Curr Biol.* 15:1165–1175.
- 580 Bai, L., Lee, Y., Hsu, C.T., Williams, J.A., Cavanaugh, D., Zheng, X., Stein, C., Haynes, P.,  
581 Wang, H., Gutmann, D.H., *et al.*,. (2018). A Conserved Circadian Function for the  
582 *Neurofibromatosis 1* Gene. *Cell Rep.* 22, 3416–3426.
- 583 Birman S. (2005) Arousal mechanisms: speedy flies don't sleep at night. *Curr Biol.* 15:R511–  
584 513.
- 585 Cavanaugh, D.J.J., Geratowski, J.D.D., Wooltorton, J.R.A.R.A., Spaethling, J.M.M., Hector,  
586 C.E.E., Zheng, X., Johnson, E.C.C., Eberwine, J.H.H., and Sehgal, A. (2014). Identification of a  
587 Circadian Output Circuit for Rest:Activity Rhythms in *Drosophila*. *Cell* 157: 689–701.
- 588 Cavey, M., Collins, B., Bertet, C., and Blau, J. (2016). Circadian rhythms in neuronal activity  
589 propagate through output circuits. *Nat. Neurosci.* 19: 1–11.
- 590 Chang HY, Grygoruk A, Brooks ES, Ackerson LC, Maidment NT, Bainton RJ, Krantz DE.  
591 (2006) Overexpression of the *Drosophila* vesicular monoamine transporter increases motor  
592 activity and courtship but decreases the behavioral response to cocaine. *Mol. Psychiatry.* 11:99–  
593 113.
- 594 Chen, T.-W., Wardill, T.J., Sun, Y., Pulver, S.R., Renninger, S.L., Baohan, A., Schreiter, E.R.,  
595 Kerr, R. a, Orger, M.B., Jayaraman, V., *et al.*,. (2013). Ultrasensitive fluorescent proteins for  
596 imaging neuronal activity. *Nature* 499: 295–300.

- 597 Dana, H., Mohar, B., Sun, Y., Narayan, S., Gordus, A., Hasseman, J. P., ... & Patel, R. (2016).  
598 Sensitive red protein calcium indicators for imaging neural activity. *Elife*, 5: e12727.
- 599 De La Iglesia HO, Meyer J, and Schwartz WJ (2003) Lateralization of circadian pacemaker  
600 output: activation of left- and right-sided luteinizing hormone-releasing hormone neurons  
601 involves a neural rather than a humoral pathway. *J Neurosci* 23:7412-7414.
- 602 Donlea, J.M., Pimentel, D., Talbot, C.B., Kempf, A., Omoto, J.J., Hartenstein, V., and  
603 Miesenböck, G. (2018). Recurrent Circuitry for Balancing Sleep Need and Sleep. *Neuron*. 97:  
604 378-389
- 605 Fifel, K., Meijer, J. H., & Deboer, T. (2018). Circadian and Homeostatic Modulation of Multi-  
606 Unit Activity in Midbrain Dopaminergic Structures. *Scientific reports* 8: 7765.
- 607 Froy, O., Gotter, A. L., Casselman, A. L., & Reppert, S. M. (2003). Illuminating the circadian  
608 clock in monarch butterfly migration. *Science*, 300: 1303-1305.
- 609 Grima, B., Chélot, E., Xia, R., and Rouyer, F. (2004). Morning and evening peaks of activity rely  
610 on different clock neurons of the *Drosophila* brain. *Nature* 431: 869–873.
- 611 Guo, F., Holla, M., Diaz, M. M., & Rosbash, M. (2018). A circadian output circuit controls  
612 sleep-wake arousal threshold in *Drosophila*. *bioRxiv*. 298067.
- 613 Heinze, S., and Reppert, S.M. (2011). Sun Compass Integration of Skylight Cues in Migratory  
614 Monarch Butterflies. *Neuron* 69: 345–358.
- 615 Helfrich-Förster C. (2005) Neurobiology of the fruit fly's circadian clock. *Genes Brain Behav*.  
616 24: 65-76.

- 617 Hirsh J, Riemensperger T, Coulom H, Iché M, Coupar J, Birman S. (2010) Roles of dopamine in  
618 circadian rhythmicity and extreme light sensitivity of circadian entrainment. *Curr Biol.* 20: 209-14.  
619 PMID: 20096587
- 620 Kalsbeek A, Palm IF, La Fleur SE, Scheer FA, Perreau-Lenz S, Ruitter M, Kreier F, Cailotto C,  
621 Buijs RM. (2006) SCN outputs and the hypothalamic balance of life. *J Biol Rhythms.* 21: 458-  
622 469.
- 623 Kaneko, M., and Hall, J.C. (2000). Neuroanatomy of cells expressing clock genes in *Drosophila*:  
624 transgenic manipulation of the period and timeless genes to mark the perikarya of circadian  
625 pacemaker neurons and their projections. *J. Comp. Neurol.* 422: 66–94.
- 626 Klose, M., Duvall, L.B.B., Li, W., Liang, X., Ren, C., Steinbach, J.H.H., and Taghert, P.H.  
627 (2016). Functional PDF Signaling in the *Drosophila* Circadian Neural Circuit Is Gated by Ral A-  
628 Dependent Modulation. *Neuron* 90: 1–14.
- 629 Kong, E.C., Woo, K., Li, H., Lebestky, T., Mayer, N., Sniffen, M.R., Heberlein, U., Bainton,  
630 R.J., Hirsh, J., and Wolf, F.W. (2010). A pair of dopamine neurons target the D1-like dopamine  
631 receptor dopr in the central complex to promote ethanol-stimulated locomotion in *Drosophila*.  
632 PLoS One 5: e9954.
- 633 Konopka, R.J., and Benzer, S. (1971). Clock mutants of *Drosophila melanogaster*. *Proc. Natl.*  
634 *Acad. Sci. U. S. A.* 68: 2112–2116.
- 635 Kudo, T., Loh, D. H., Truong, D., Wu, Y., & Colwell, C. S. (2011). Circadian dysfunction in a  
636 mouse model of Parkinson's disease. *Experimental neurology*, 232: 66-75.

- 637 Kume K, Kume S, Park SK, Hirsh J, Jackson FR. (2005) Dopamine is a regulator of arousal in  
638 the fruit fly. *J Neurosci.* 25:7377–7384.
- 639 Lamaze, A., Kratschmer, P., and Jepson, J.E.. (2018). A sleep-regulatory circuit integrating  
640 circadian, homeostatic and environmental information in *Drosophila*. *BioRxiv.* 250829.
- 641 Landgraf D, Joiner WJ McCarthy MJ, Kiessling S, Barandas R, Young JW, Cermakian N, Welsh  
642 DK. (2016) The mood stabilizer valproic acid opposes the effects of dopamine on circadian  
643 rhythms. *Neuropharmacology.* 107: 262-270.
- 644 Lebestky T, Chang JS, Dankert H, Zelnik L, Kim YC, Han KA, Wolf FW, Perona P, Anderson  
645 DJ. (2009) Two different forms of arousal in *Drosophila* are oppositely regulated by the  
646 dopamine D1 receptor ortholog DopR via distinct neural circuits. *Neuron.* 64: 522-536.
- 647 Lehman MN, Silver R, Gladstone WR, Kahn RM, Gibson M, and Bittman EL (1987) Circadian  
648 rhythmicity restored by neural transplant. Immunocytochemical characterization of the graft and  
649 its integration with the host brain. *J Neurosci* 7: 1626-1638.
- 650 Liang, X., Holy, T.E., and Taghert, P.H. (2016). Synchronous *Drosophila* circadian pacemakers  
651 display nonsynchronous Ca<sup>2+</sup> rhythms in vivo. *Science* 351: 976-981.
- 652 Liang, X., Holy, T.E., and Taghert, P.H. (2017). A Series of Suppressive Signals within the  
653 *Drosophila* Circadian Neural Circuit Generates Sequential Daily Outputs. *Neuron* 94: 1173-  
654 1189.
- 655 Lima SQ, Miesenbock G. (2005) Remote control of behavior through genetically targeted  
656 photostimulation of neurons. *Cell.* 121: 141–152.

- 657 Liu Q, Liu S, Kodama L, Driscoll MR, Wu MN. (2012) Two dopaminergic neurons signal to the  
658 dorsal fan-shaped body to promote wakefulness in *Drosophila*. *Curr Biol*. 22: 2114-2123.
- 659 Liu, S., Liu, Q., Tabuchi, M., and Wu, M.N. (2016). Sleep Drive Is Encoded by Neural Plastic  
660 Changes in a Dedicated Circuit. *Cell* 165: 1347-1360.
- 661 Luo, A. H., & Aston-Jones, G. (2009). Circuit projection from suprachiasmatic nucleus to ventral  
662 tegmental area: a novel circadian output pathway. *European Journal of Neuroscience*, 29: 748-  
663 760.
- 664 Martín-Peña, A., Acebes, A., Rodríguez, J.R., Chevalier, V., Casas-Tinto, S., Triphan, T.,  
665 Strauss, R., and Ferrús, A. (2014). Cell types and coincident synapses in the ellipsoid body of  
666 *Drosophila*. *Eur. J. Neurosci*. 39: 1586–1601.
- 667 Moore RY, Klein DC. (1974) Visual pathways and the central neural control of a circadian  
668 rhythm in pineal serotonin N-acetyltransferase activity. *Brain Res*. 71:17-33.
- 669 Neuser, K., Triphan, T., Mronz, M., Poeck, B., & Strauss, R. (2008). Analysis of a spatial  
670 orientation memory in *Drosophila*. *Nature* 453: 1244.
- 671 Nitabach, M.N., and Taghert, P.H. (2008). Organization of the *Drosophila* circadian control  
672 circuit. *Curr. Biol*. 18, R84-93.
- 673 Ofstad, T. A., Zuker, C. S., and Reiser, M. B. (2011). Visual place learning in *Drosophila*  
674 melanogaster. *Nature*, 474, 204.

- 675 Omoto, J.J., Keleş, M.F., Nguyen, B.C.M., Bolanos, C., Lovick, J.K., Frye, M.A., and  
676 Hartenstein, V. (2017). Visual Input to the *Drosophila* Central Complex by Developmentally and  
677 Functionally Distinct Neuronal Populations. *Curr. Biol.* 27, 1098–1110.
- 678 Pfeiffer, K., and Homberg, U. (2014). Organization and Functional Roles of the Central  
679 Complex in the Insect Brain. *Annu. Rev. Entomol.* 59: 2014.
- 680 Pérez, N., Christmann, B.L., and Griffith, L.C. (2013). Daily rhythms in locomotor circuits in  
681 *Drosophila* involve PDF. *J. Neurophysiol.* 110, 700–708.
- 682 Potdar, S., & Sheeba, V. (2018). Wakefulness Is Promoted during Day Time by PDFR Signalling  
683 to Dopaminergic Neurons in *Drosophila melanogaster*. *eNeuro*, 5(4).
- 684 Ralph MR, Foster RG, Davis FC, and Menaker M (1990) Transplanted suprachiasmatic nucleus  
685 determines circadian period. *Science* 247:975-978.
- 686 Renn, S.C.P., Armstrong, J.D., Yang, M., Wang, Z., An, X., Kaiser, K., and Taghert, P.H.  
687 (1999a). Genetic analysis of the *Drosophila* ellipsoid body neuropil: Organization and  
688 development of the central complex. *J. Neurobiol.* 41, 189–207.
- 689 Renn, S.C., Park, J.H., Rosbash, M., Hall, J.C., and Taghert, P.H. (1999b). A *pdf* neuropeptide  
690 gene mutation and ablation of PDF neurons each cause severe abnormalities of behavioral  
691 circadian rhythms in *Drosophila*. *Cell* 99: 791–802.
- 692 Robie, A.A., Hirokawa, J., Edwards, A.W., Umayam, L.A., Lee, A., Phillips, M.L., Card, G.M.,  
693 Korff, W., Rubin, G.M., Simpson, J.H., *et al.*. (2017). Mapping the Neural Substrates of  
694 Behavior. *Cell* 170: 393–406.e28.

- 695 Seelig, J.D., and Jayaraman, V. (2013). Feature detection and orientation tuning in the  
696 *Drosophila* central complex. *Nature* 503: 262–266.
- 697 Selcho, M., Millán, C., Palacios-Muñoz, A., Ruf, F., Ubillo, L., Chen, J., Bergmann, G., Ito, C.,  
698 Silva, V., Wegener, C., et al. (2017). Central and peripheral clocks are coupled by a neuropeptide  
699 pathway in *Drosophila*. *Nat. Commun.* 8: 15563.
- 700 Shang, Y., Donelson, N.C., Vecsey, C.G., Guo, F., Rosbash, M., and Griffith, L.C. (2013). Short  
701 neuropeptide F is a sleep-promoting inhibitory modulator. *Neuron* 80: 171–183.
- 702 Shang, Y., Haynes, P., Pérez, N., Harrington, K.I., Guo, F., Pollack, J., Hong, P., Griffith, L.C.,  
703 and Rosbash, M. (2011). Imaging analysis of clock neurons reveals light buffers the wake-  
704 promoting effect of dopamine. *Nat. Neurosci.* 14: 889–895.
- 705 Shiozaki, H.M., and Kazama, H. (2017). Parallel encoding of recent visual experience and self-  
706 motion during navigation in *Drosophila*. *Nat. Neurosci.* 20: 1395–1403.
- 707 Sleipness, E. P., Sorg, B. A., & Jansen, H. T. (2007). Diurnal differences in dopamine transporter  
708 and tyrosine hydroxylase levels in rat brain: dependence on the suprachiasmatic nucleus. *Brain*  
709 *research*, 1129: 34-42.
- 710 Smith, A. D., Olson, R. J., & Justice Jr, J. B. (1992). Quantitative microdialysis of dopamine in  
711 the striatum: effect of circadian variation. *Journal of neuroscience methods*, 44: 33-41.
- 712 Stoleru, D., Nawathean, P., Fernández, M.D.L.P., Menet, J.S., Ceriani, M.F., and Rosbash, M.  
713 (2007). The *Drosophila* circadian network is a seasonal timer. *Cell* 129: 207–219.

- 714 Stoleru, D., Peng, Y., Agosto, J., and Rosbash, M. (2004). Coupled oscillators control morning  
715 and evening locomotor behaviour of *Drosophila*. *Nature* 431: 862-868.
- 716 Stoleru, D., Peng, Y., Nawathean, P., and Rosbash, M. (2005). A resetting signal between  
717 *Drosophila* pacemakers synchronizes morning and evening activity. *Nature* 438, 238–242.
- 718 Strauss, R., and Heisenberg, M. (1993). A higher control center of locomotor behavior in the  
719 *Drosophila* brain. *J. Neurosci.* 13: 1852–1861.
- 720 Sun, Y., Nern, A., Franconville, R., Dana, H., Schreiter, E.R., Looger, L.L., Svoboda, K., Kim,  
721 D.S., Hermundstad, A.M., and Jayaraman, V. (2017). Neural signatures of dynamic stimulus  
722 selection in *Drosophila*. *Nat. Neurosci.* 20: 1104-1113
- 723 Sweeney, S. T., Broadie, K., Keane, J., Niemann, H., & O'Kane, C. J. (1995). Targeted  
724 expression of tetanus toxin light chain in *Drosophila* specifically eliminates synaptic  
725 transmission and causes behavioral defects. *Neuron*, 14(2), 341-351.
- 726 Taylor, T. N., Caudle, W. M., Shepherd, K. R., Noorian, A., Jackson, C. R., Iuvone, P. M., ... &  
727 Miller, G. W. (2009). Nonmotor symptoms of Parkinson's disease revealed in an animal model  
728 with reduced monoamine storage capacity. *Journal of Neuroscience*, 29(25), 8103-8113.
- 729 VanderLeest HT, Houben T, Michel S, Deboer T, Albus H, Vansteensel MJ, Block  
730 GD, Meijer JH. (2007). Seasonal encoding by the circadian pacemaker of the SCN. *Current*  
731 *Biol.* 17: 468-473.
- 732 van Swinderen B, Andretic R. (2003). Arousal in *Drosophila*. *Behavioural Processes.* 64:133–  
733 144.



- 734 Videnovic, A., and Golombek, D. (2017). Circadian dysregulation in Parkinson's disease.  
735 Neurobiol. Sleep Circadian Rhythm. 2: 53–58.
- 736 Wu MN, Koh K, Yue Z, Joiner WJ, Sehgal A. (2008). A genetic screen for sleep and circadian  
737 mutants reveals mechanisms underlying regulation of sleep in *Drosophila*. *Sleep*. 31: 465–472.
- 738 Yao Z, Shafer OT. (2014). The *Drosophila* circadian clock is a variably coupled network of  
739 multiple peptidergic units. *Science*. 343:1516-1520.
- 740 Yoshii, T., Funada, Y., Ibuki-Ishibashi, T., Matsumoto, A., Tanimura, T., and Tomioka, K.  
741 (2004). *Drosophila cryb* mutation reveals two circadian clocks that drive locomotor rhythm and  
742 have different responsiveness to light. *J. Insect Physiol.* 50: 479–488.
- 743 Yurgel, M. E., Kakad, P., Zandawala, M., Nassel, D. R., Godenschwege, T. A., & Keene, A.  
744 (2018). A single pair of leucokinin neurons are modulated by feeding state and regulate sleep-  
745 metabolism interactions. *BioRxiv*, 313213.
- 746 Zandawala M, Yurgel ME , Liao S , Texada MJ , Rewitz KF, Keene AC , and Nässel DR (2018)  
747 Orchestration of *Drosophila* post-feeding physiology and behavior by the neuropeptide  
748 leucokinin. *bioRxiv*, 355107.

749 **Method References**

- 750 Bahn, J. H., Lee, G. G., & Park, J. H. (2009). Comparative analysis of Pdf-mediated circadian  
751 behaviors between *Drosophila melanogaster* and *Drosophila virilis*. *Genetics*.
- 752 Blau, J., and Young, M.W. (1999). Cycling vrille expression is required for a functional  
753 *Drosophila* clock. *Cell* 99, 661–671.
- 754 Hartigan, J. A. and Hartigan, P. M. (1985). The Dip Test of Unimodality, *Journal of the*  
755 *American Statistical Association*, 86, 738–746.
- 756 Holekamp, T.F., Turaga, D., and Holy, T.E. (2008). Fast three-dimensional fluorescence imaging  
757 of activity in neural populations by objective-coupled planar illumination microscopy. *Neuron*  
758 57, 661–672.
- 759 Hyun, S., Lee, Y., Hong, S.-T., Bang, S., Paik, D., Kang, J., Shin, J., Lee, J., Jeon, K., Hwang,  
760 S., *et al.*,. (2005). *Drosophila* GPCR Han is a receptor for the circadian clock neuropeptide PDF.  
761 *Neuron* 48, 267–278.
- 762 Im, S.H., and Taghert, P.H. (2010). PDF Receptor Expression Reveals Direct Interactions  
763 between Circadian Oscillators in *Drosophila*. *J. Comp. Neurol.* 518, 1925–1945.
- 764 Levine, J., Funes, P., Dowse, H., and Hall, J. (2002). Signal analysis of behavioral and molecular  
765 cycles. *BMC Neurosci.* 25, 1–25.
- 766 Liu, Q., Tabuchi, M., Liu, S., Kodama, L., Horiuchi, W., Daniels, J., Chiu, L., Baldoni, D., and  
767 Wu, M.N. (2017). Branch-specific plasticity of a bifunctional dopamine circuit encodes protein  
768 hunger. *Science* (80-. ). 356, 534–539.

769 Martinek, S., Inonog, S., Manoukian, A. S., & Young, M. W. (2001). A role for the segment  
770 polarity gene shaggy/GSK-3 in the Drosophila circadian clock. *Cell*, 105(6), 769-779.

771 Ostroy, S. E., & Pak, W. L. (1974). Protein and electroretinogram changes in the alleles of the  
772 norp Ap12 Drosophila phototransduction mutant. *Biochimica et Biophysica Acta (BBA)-*  
773 *Bioenergetics*, 368(2), 259-268.

774 Schindelin, J., Arganda-Carreras, I., Frise, E., Kaynig, V., Longair, M., Pietzsch, T., Preibisch,  
775 S., Rueden, C., Saalfeld, S., Schmid, B., *et al.* (2012). Fiji: an open-source platform for  
776 biological-image analysis. *Nat. Methods* 9, 676–682.

777 Silverman, B. W. (1981). Using kernel density estimates to investigate multimodality, *Journal of*  
778 *the Royal Statistical Society. Series B*, 43, 97–99.

779 Stanewsky, R., Jamison, C.F., Plautz, J.D., Kay, S. a, and Hall, J.C. (1997). Multiple circadian-  
780 regulated elements contribute to cycling period gene expression in Drosophila. *EMBO J.* 16,  
781 5006–5018.

782 Xie, T., Ho, M.C.W., Liu, Q., Horiuchi, W., Lin, C.-C.C., Task, D., Luan, H., White, B.H.,  
783 Potter, C.J., and Wu, M.N. (2018). A Genetic Toolkit for Dissecting Dopamine Circuit Function  
784 in Drosophila. *Cell Rep.* 23, 652–665.

785 Yao, Z., Macara, A.M., Lelito, K.R., Minosyan, T.Y., and Shafer, O.T. (2012). Analysis of  
786 functional neuronal connectivity in the Drosophila brain. *J. Neurophysiol.* 108, 684–696.

787

788 **Acknowledgments:**

789 We thank Cody Greer for building the OCPI-2 microscope, the Holy and Taghert laboratories for  
790 advice, and the Washington University Center for Cellular Imaging (WUCCI) for technical  
791 support. Heather Dionne, Gerry Rubin, Aljoscha Nern, and Francois Rouyer kindly shared  
792 unpublished fly stocks and information. Orië Shafer, Michael Rosbash, the Bloomington Stock  
793 Center, and Janelia Research Center provided fly stocks and reagents. The work was supported  
794 by the Washington University McDonnell Center for Cellular and Molecular Neurobiology and  
795 by NIH grants R01 NS068409 and R01 DP1 DA035081 (T.E.H.), R01 MH067122 (P.H.T.), R24  
796 NS086741 (T.E.H. and P.H.T.), NIH Training Grant T32HL110952 (M.C.W.H.), and  
797 R01NS079584 (M.W.).

798 **Author contributions:** X.L., M.W., T.H.E., and P.H.T. conceived the experiments; X.L.  
799 performed and analyzed all experiments; M.C.W.H. generated and characterized the dopamine-  
800 related transgenic fly lines. X.L., M.C.W.H., M.W., T.H.E., and P.H.T. wrote the manuscript.

801 **Competing interests:** The authors declare no competing interests. T.E.H. has a patent on OCPI  
802 microscopy.

803 **Materials & Correspondence.:** Materials, raw image data, and codes are available upon request  
804 to P.H.T. (taghertp@pcg.wustl.edu).

805

# Figure 1

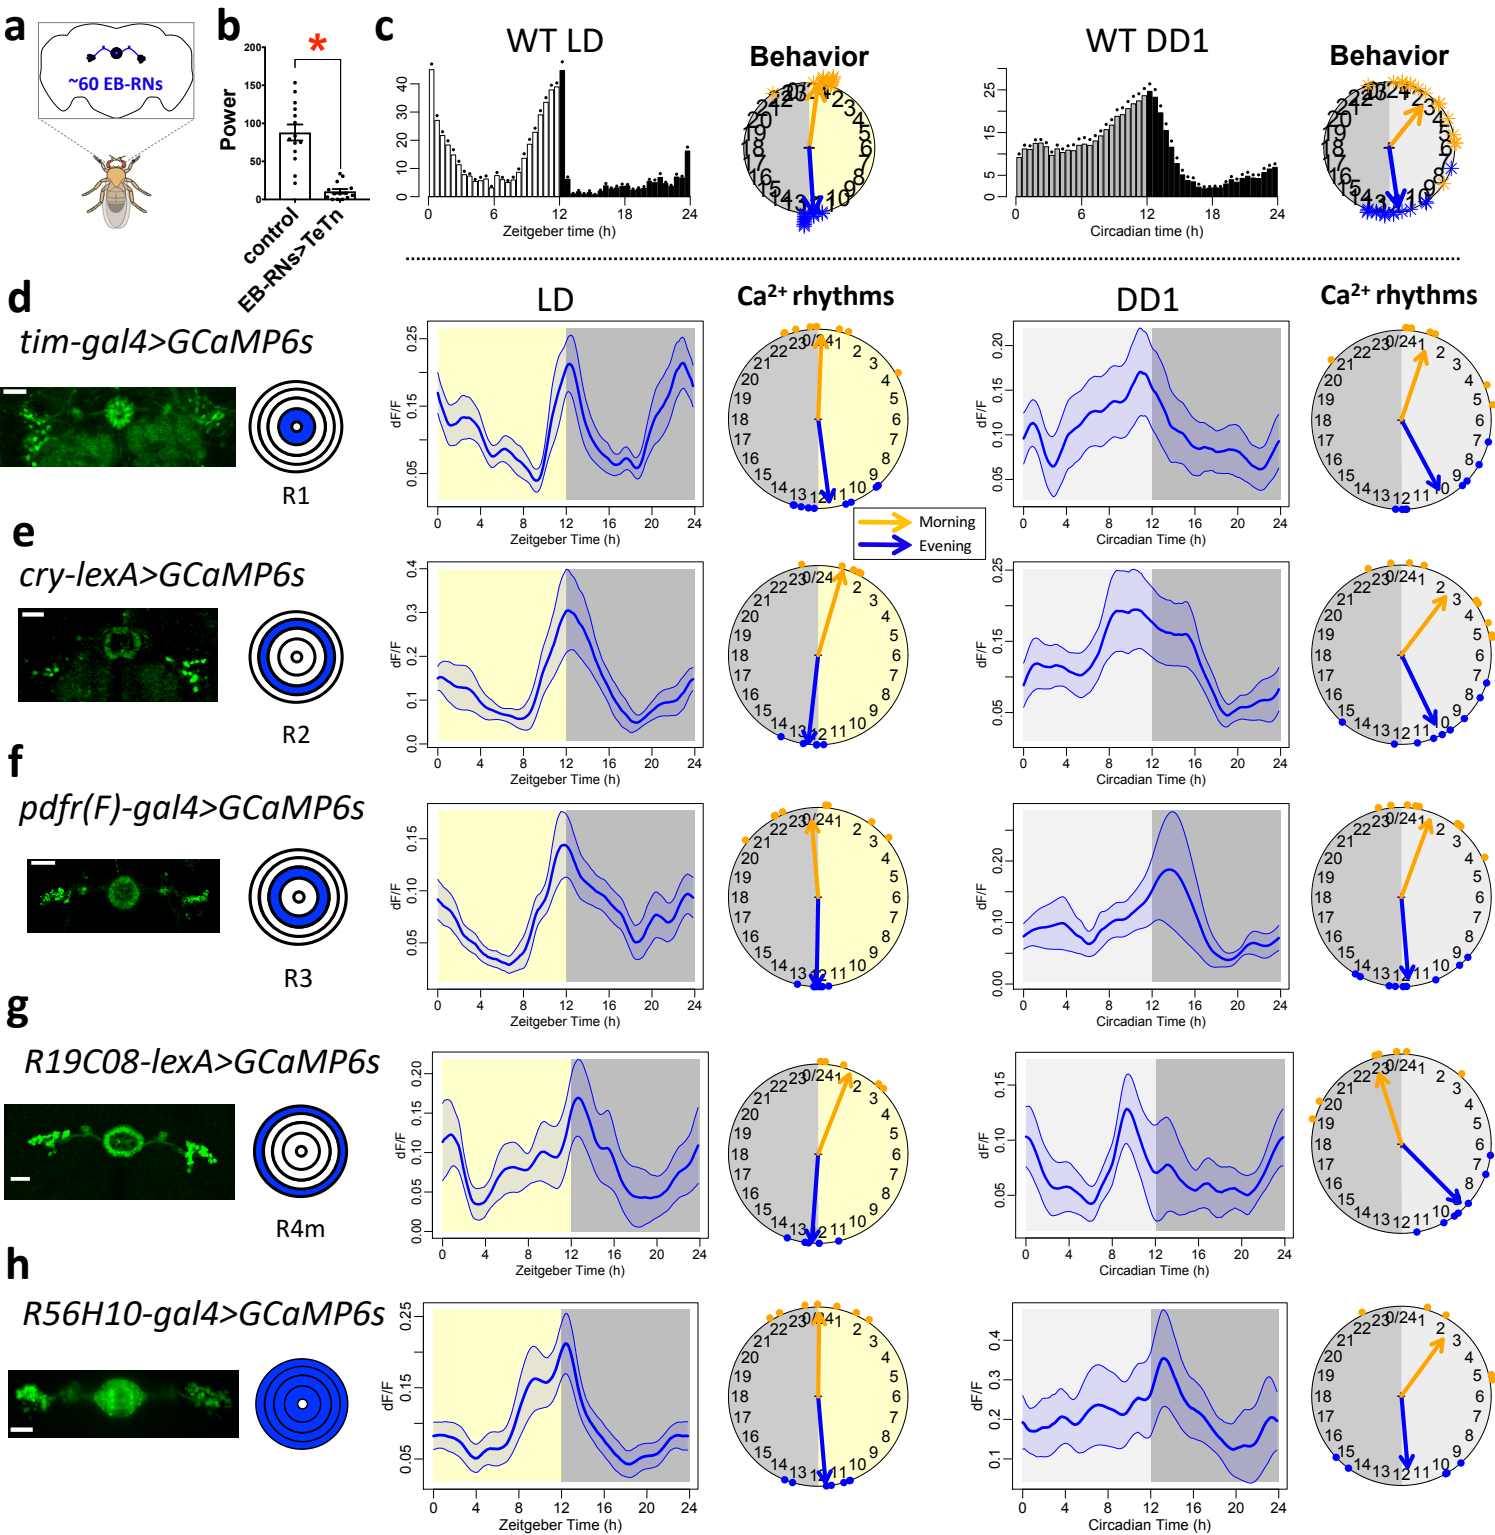

**Figure 1. Daily bimodal neural activity patterns of EB ring neurons.** (a) The ellipsoid body ring neurons (EB-RNs) in the fly brain. (b) Average rhythm strength (power) of locomotor activity for 9 days under constant darkness (DD) of control and flies with TeTn expressed in EB-RNs; asterisk denotes significant differences compared to control ( $P < 0.0001$ , Mann-Whitney test). (c) The average locomotor activity histogram and phase distributions of behavioral peaks of wild type *R56H10-gal4/GCaMP6s* flies (left) under 12-hr light: 12-hr dark (LD) cycle and (right) in the first day under DD ( $n = 16$  flies). Dots indicate SEM. (d-h) Daily Ca<sup>2+</sup> activity patterns of the EB ring neuron subgroups: (d) R1 labelled by *tim-gal4*, (e) R2 labelled by *cry-lexA*, (f) R3 labelled by *pdfr(F)-gal4*, (g) R4 labelled by *R19H08(pdfr)-lexA*, and (h) R1-4 labelled by *R56H10-gal4*. Left, confocal images of EB ring neurons and diagrams of their concentric arborization radii; scale bars, 25  $\mu$ m. Middle and Right, average Ca<sup>2+</sup> transients and Ca<sup>2+</sup> phase distribution for both morning peaks (orange dots and arrow) and evening peaks (blue dots and arrow). Middle - under LD; Right - under DD.

## Figure 2

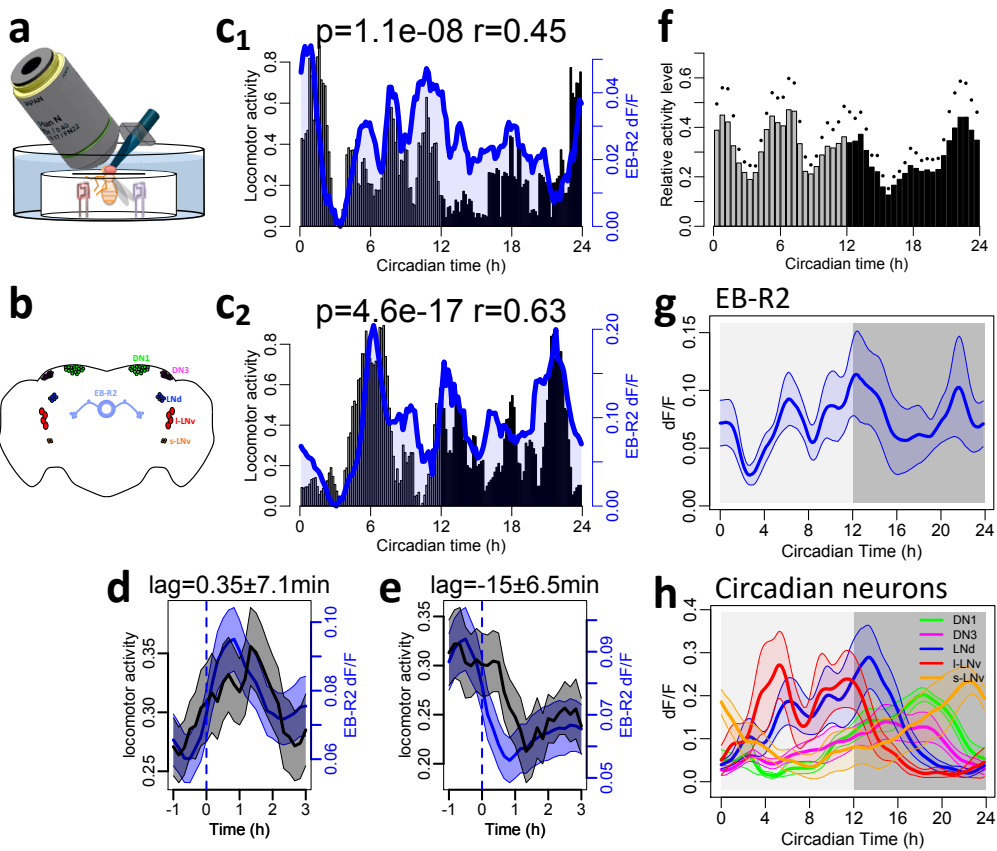

**Figure 2. EB ring neuron activity is correlated with locomotor activity.** (a) Illustration of long-term *in vivo* imaging with infrared measurement of locomotor activity (see Methods). (b) Map of the major circadian neuron groups and EB ring neurons. (c) Representative recordings of two flies: bars, normalized locomotor activity counts per 10 m; blue traces,  $\text{Ca}^{2+}$  activity of EB-R2 neurons in the same fly. (d-e) Average locomotor activity (black) and  $\text{Ca}^{2+}$  activity (blue) aligned by (d) increasing phase and (e) decreasing phase of  $\text{Ca}^{2+}$  activity. The averaged phase lags were calculated by cross-correlation: (c)  $0.35\pm 7$  min; (d)  $-15\pm 0.5$  min. (f-h) Average locomotor activity (f) and average  $\text{Ca}^{2+}$  transients of (g) EB-R2 neurons and (h) circadian pacemaker neurons in the same flies ( $n = 6$  flies). Dots and shading indicate SEM.

# Figure 3

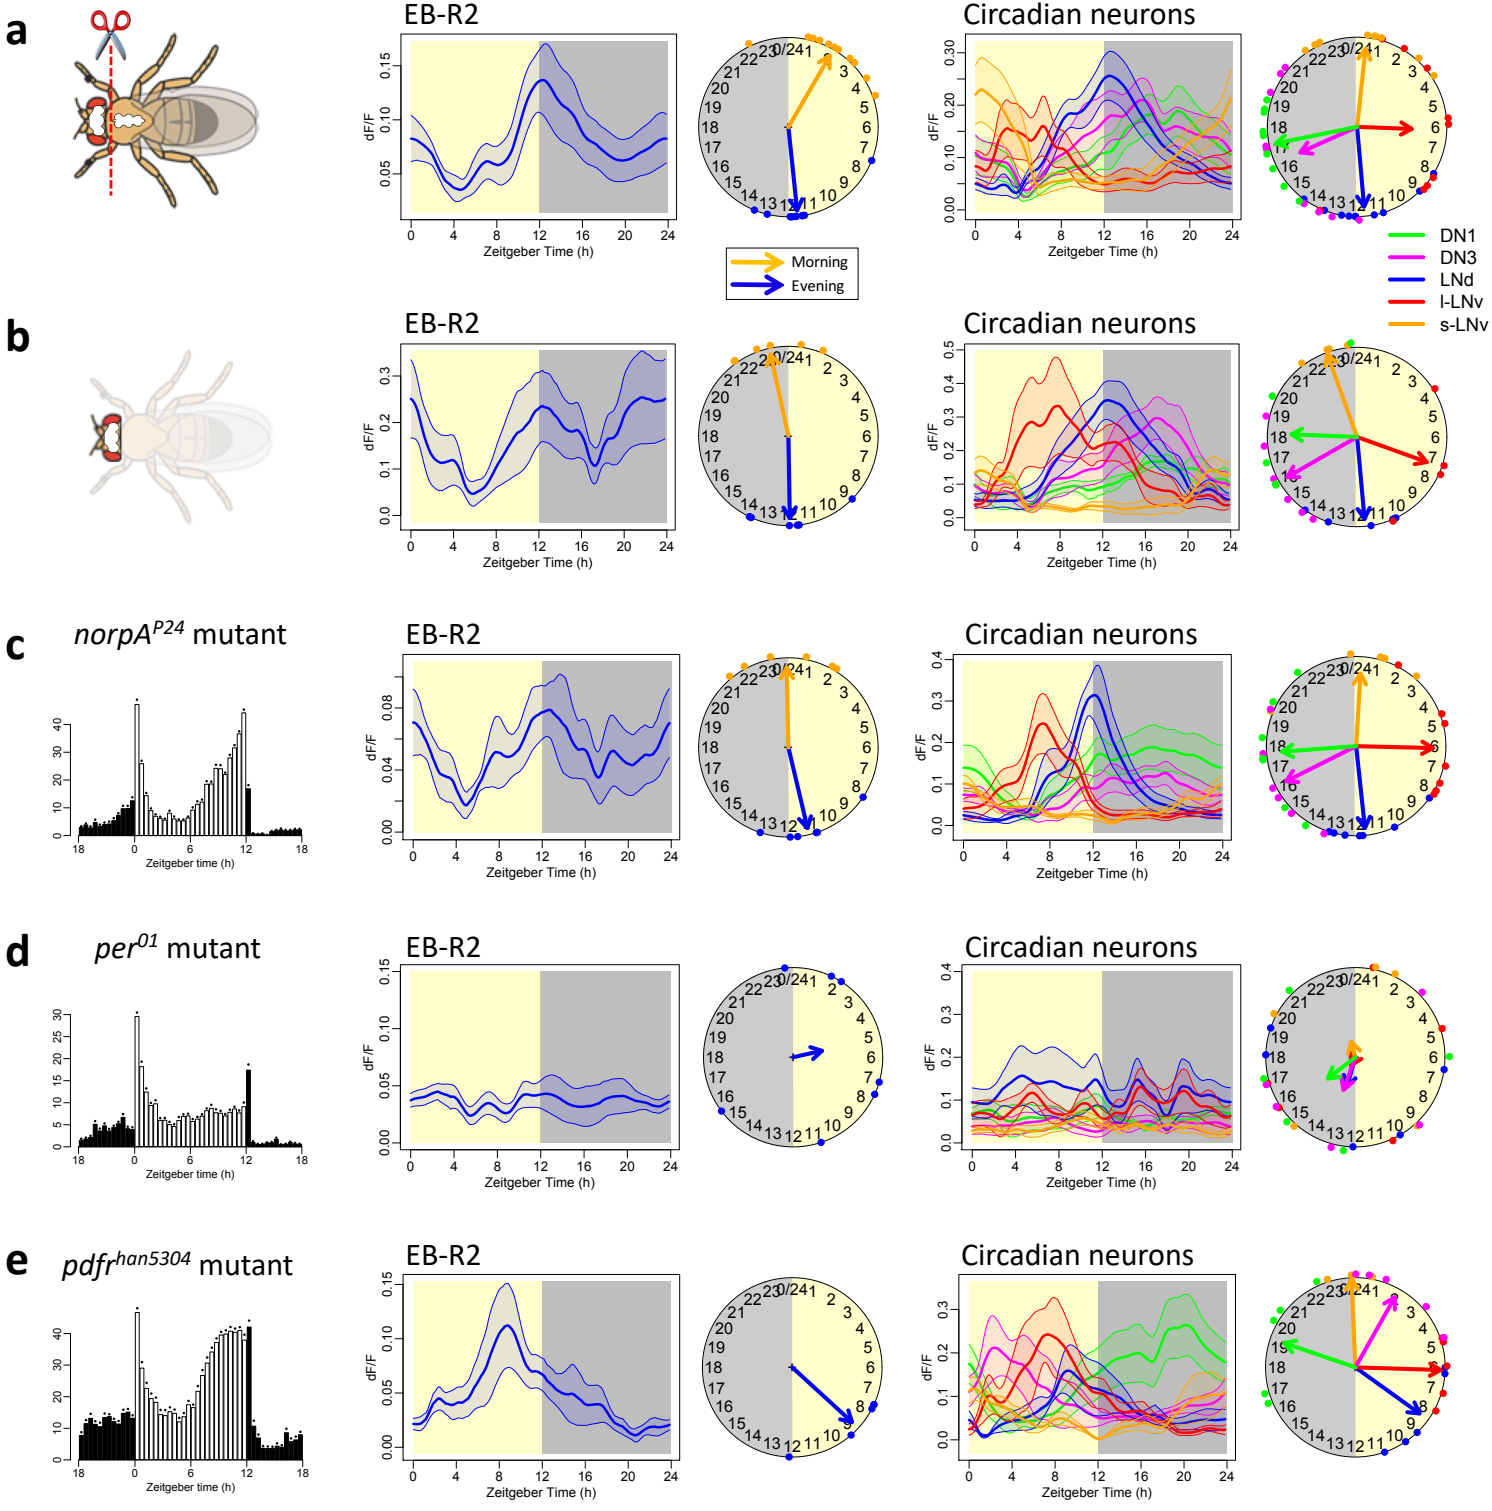

**Figure 3. EB ring neuron rhythms are driven by clocks, not in response to behavior.** (a) Daily  $\text{Ca}^{2+}$  activity patterns of (middle) EB-R2 neurons and (right) circadian neurons under LD immediately after cutting the connectives between brain and ventral nerve cord ( $n = 10$  flies). (b) Daily  $\text{Ca}^{2+}$  activity patterns of EB-R2 and circadian neurons under LD immediately after removing the bodies ( $n = 6$  flies). (c) In blind *norpA*<sup>P24</sup> mutant flies, (left) average locomotor activity ( $n = 22$  flies) and daily  $\text{Ca}^{2+}$  activity patterns (middle) of EB-R2 neurons and (right) circadian neurons under LD ( $n = 6$  flies). (d) In *per*<sup>01</sup> mutants, average locomotor activity ( $n = 16$  flies) and arrhythmic  $\text{Ca}^{2+}$  activity patterns of EB-R2 and of circadian neurons under LD ( $n = 7$  flies). (e) In *pdfr*<sup>han5304</sup> mutants, average locomotor activity ( $n = 8$  flies) and  $\text{Ca}^{2+}$  activity patterns of EB-R2 and of circadian neurons under LD ( $n = 7$  flies).



# Figure 4

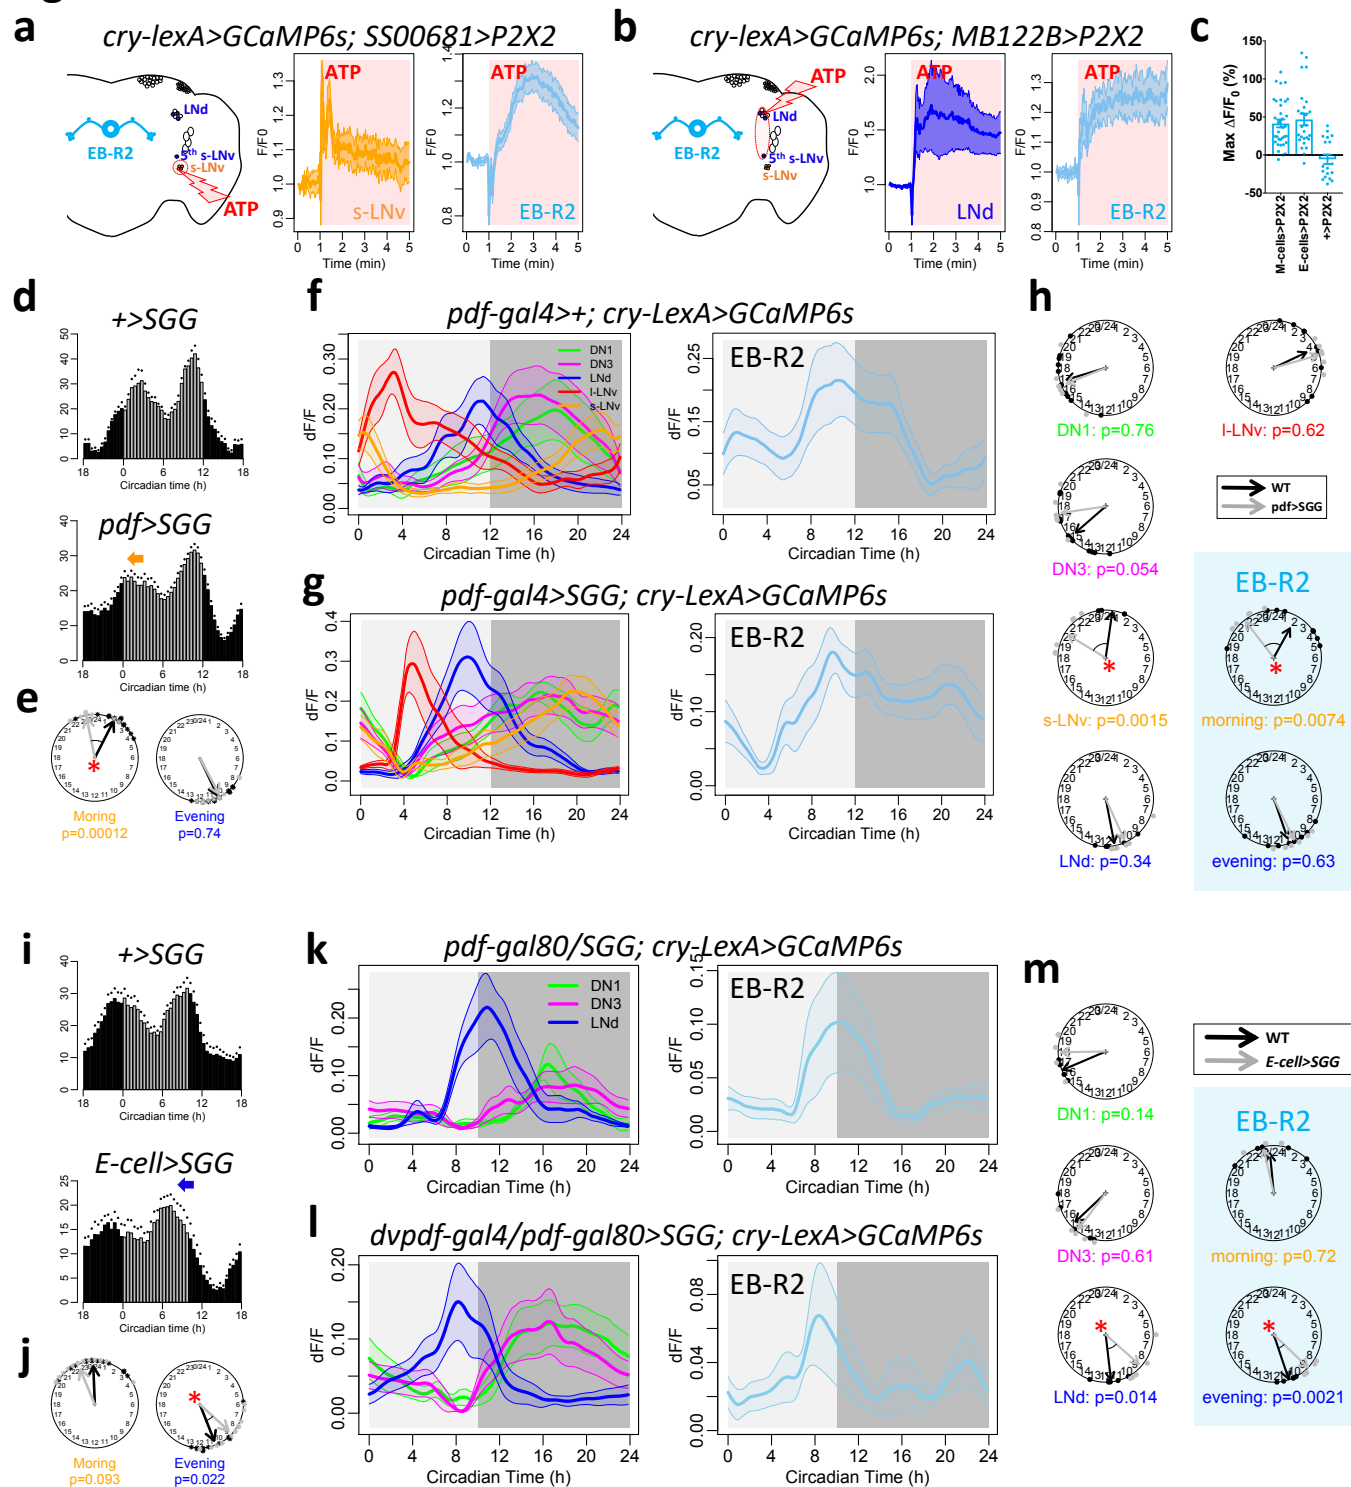

**Figure 4. Daily activity phases of EB-RNs are dictated by M and E cells.** (a) Illustration and averaged response traces of M cells (s-LNv) and EB-R2 neurons to ATP application in flies with P2X2 expressed in M cells (n = 6 flies). (b) Illustration and averaged response traces of E cells (three LNd and the 5<sup>th</sup> s-LNv neurons) and EB-R2 neurons to ATP application in flies with P2X2 expressed in E cells (n = 5 flies). (c) Maximum Ca<sup>2+</sup> changes of EB-R2 after ATP application in (a), (b), and control (n = 3 flies). (d) Average locomotor activity in DD1 of (top) wild type (WT, n = 16 flies) and (bottom) flies expressing SGG in PDF neurons (PDF>SGG, n = 24 flies). (e) Phases comparisons of morning and evening activity between WT and PDF>SGG. Note that only the morning activity phase was advanced (\* P < 0.05, Watson-Williams test). (f-g) Daily Ca<sup>2+</sup> activity patterns of (left) circadian neurons and (right) EB-R2 neurons (c) in WT flies under DD (n = 12 flies) and (d) neurons in PDF>SGG flies under DD (n = 6 flies). (h) Phase comparison of each circadian neuron group and for both morning peaks (orange) and evening peaks (blue) of EB-R2 neurons between WT and PDF>SGG flies. Note that only M cells (s-LNv) and the morning peak of EB-R2 were significantly advanced in PDF>SGG. (i) Average locomotor activity of (top) WT (n = 13 flies) and (bottom) flies expressing SGG in E cells (E-cells>SGG, n = 16 flies) in DD1 after 5 cycles of 10 h light: 14 h dark (short day, SD). (j) Phases comparisons of morning and evening activity between WT and E-cell>SGG. Note that only evening activity phases were significantly advanced. (k-l) Daily Ca<sup>2+</sup> activity patterns and phase comparisons of (left) circadian neurons (PDF neurons were invisible due to *pdf-gal80*) and (right) EB-R2 neurons in (k) WT and (l) E-cells>SGG flies after SD entrainment (n = 5 flies). s-LNv and I-LNv were invisible due to *pdf-gal80*. (m) E cells (LNd) and the evening peak of EB-R2 were significantly advanced in E-cells>SGG flies compared to WT ones.



# Figure 5

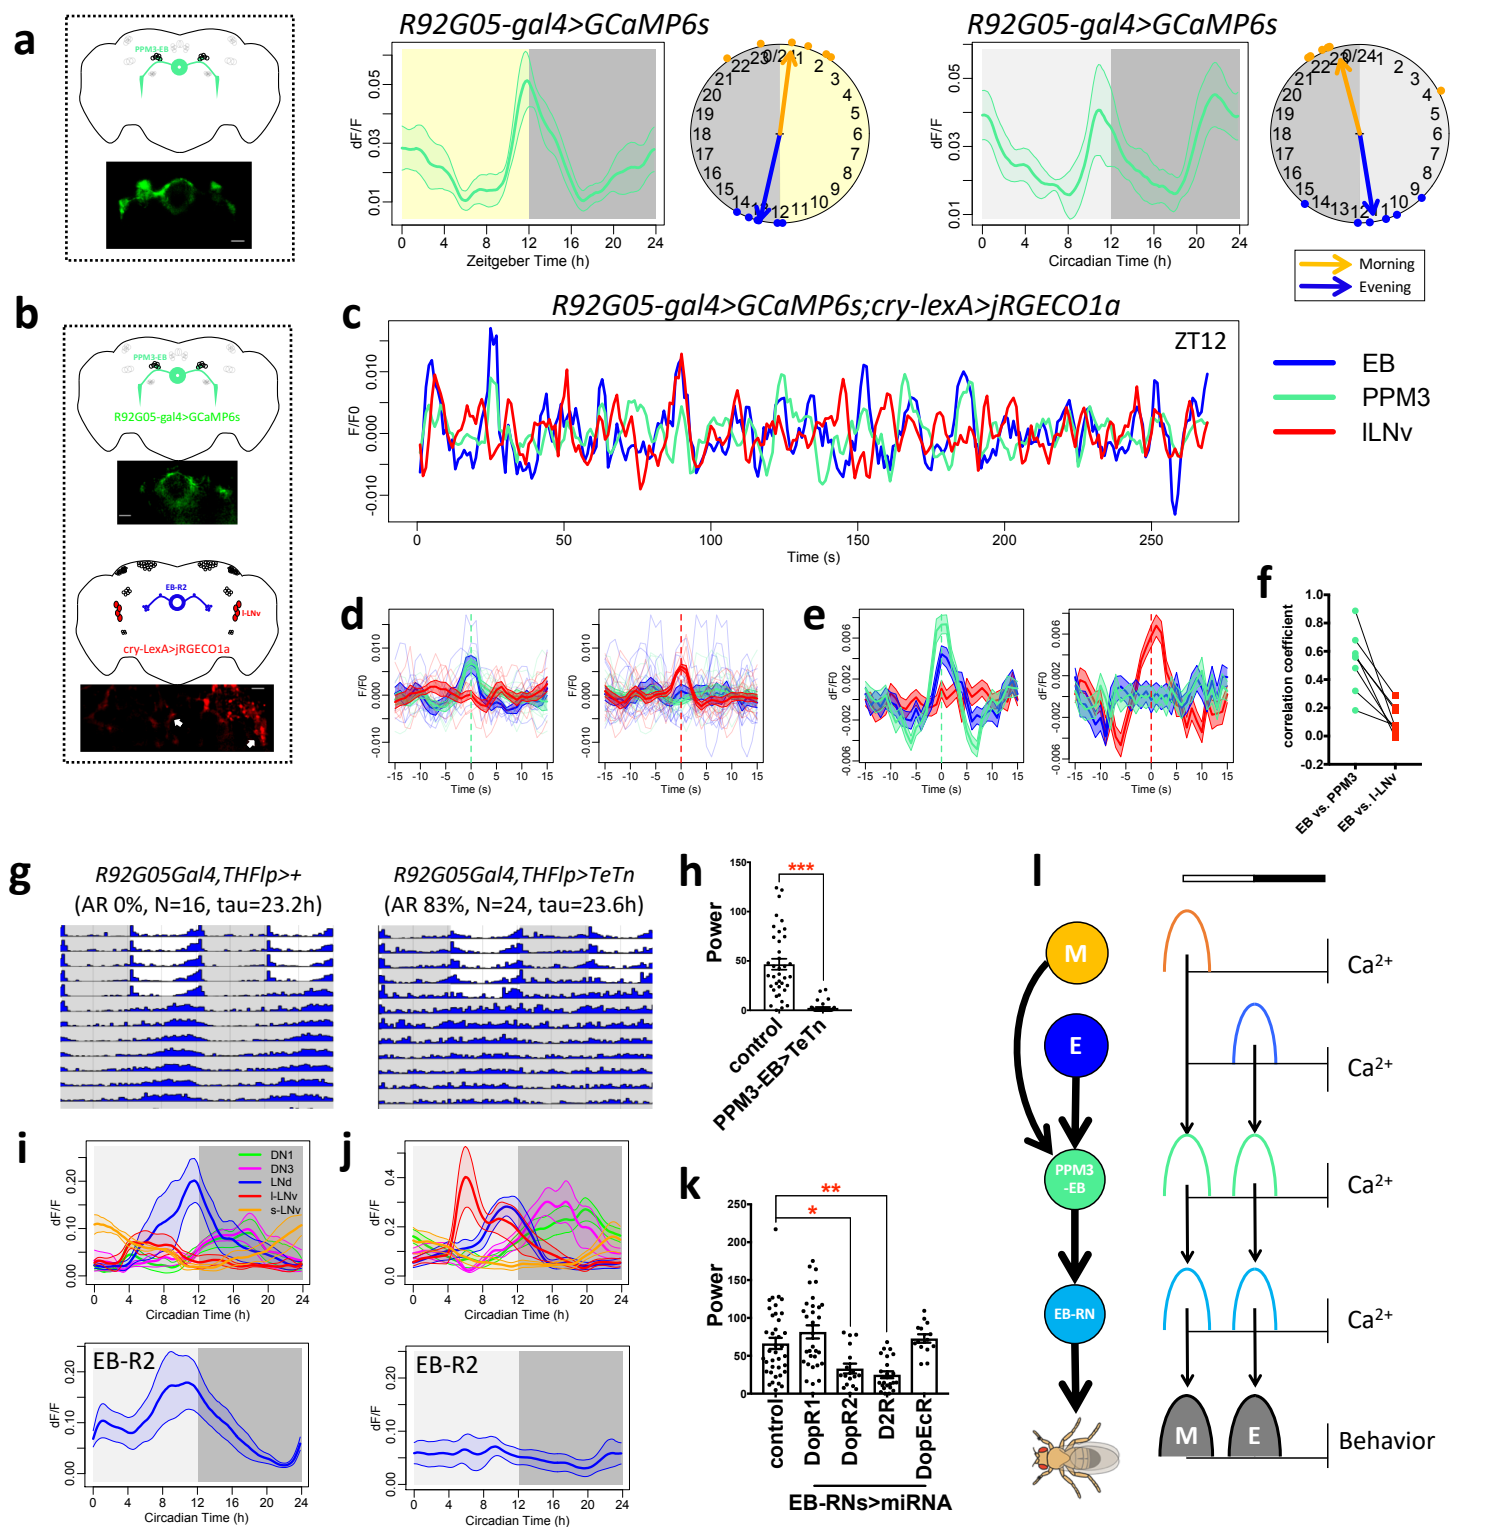

**Figure 5. PPM3-EB and EB-RNs constitute a circadian output motor circuit.** (a) Daily bimodal  $\text{Ca}^{2+}$  activity patterns of PPM3-EB under LD and DD ( $n = 6$  and  $6$  flies). (b) Illustration of dual-color  $\text{Ca}^{2+}$  imaging: GCaMP6s in PPM3-EB and jRGECO1a in EB-R2 and circadian neurons. (c) Example traces of  $\text{Ca}^{2+}$  activity in EB-R2, PPM3-EB, and I-LNv neurons (sampling rate, 1Hz). (d) Average  $\text{Ca}^{2+}$  activity traces from (c) aligned by (left) PPM3-EB peak and (right) I-LNv peak. (e) As in (d), average  $\text{Ca}^{2+}$  activity traces from all flies ( $n = 8$  flies). (f) Correlation of  $\text{Ca}^{2+}$  activity (Pearson's  $r$ ) between EB and PPM3 is considerably stronger than that between EB and I-LNv ( $p=0.0009$ , paired t-test after Fisher's Z-transform). (g) Group-averaged actograms of control (left) and flies expressing tetanus toxin (TeTn) in PPM3-EB neurons to block neurotransmission (right). (h) Average rhythm strength (power) of genotypes in (g) for 9 days under DD; asterisk denotes significant differences compared to control ( $P < 0.0001$ , Mann-Whitney test). (i-j) Daily  $\text{Ca}^{2+}$  activity patterns of circadian neurons (top) and EB-R2 neurons (bottom) under DD1 in (i) WT ( $n = 6$  flies) and (j) flies with TeTn expressed in PPM3-EB neurons ( $n = 6$  flies). (k) Average rhythm strength (power) of genotypes for 9 days under DD in which DA receptors are knocked down in EB-RNs using *R56H10-gal4*; asterisk denotes significant differences compared to control ( $P < 0.05$ , Kruskal-Wallis test followed by post hoc Dunn's tests). (l) Model of the circadian output pathway for locomotor activity rhythms: circadian pacemaker M cells and E cells independently activate EB-RN pre-motor circuits around dawn and dusk through the relay of PPM3-EB dopaminergic neurons.

# Extended Data Figure 1

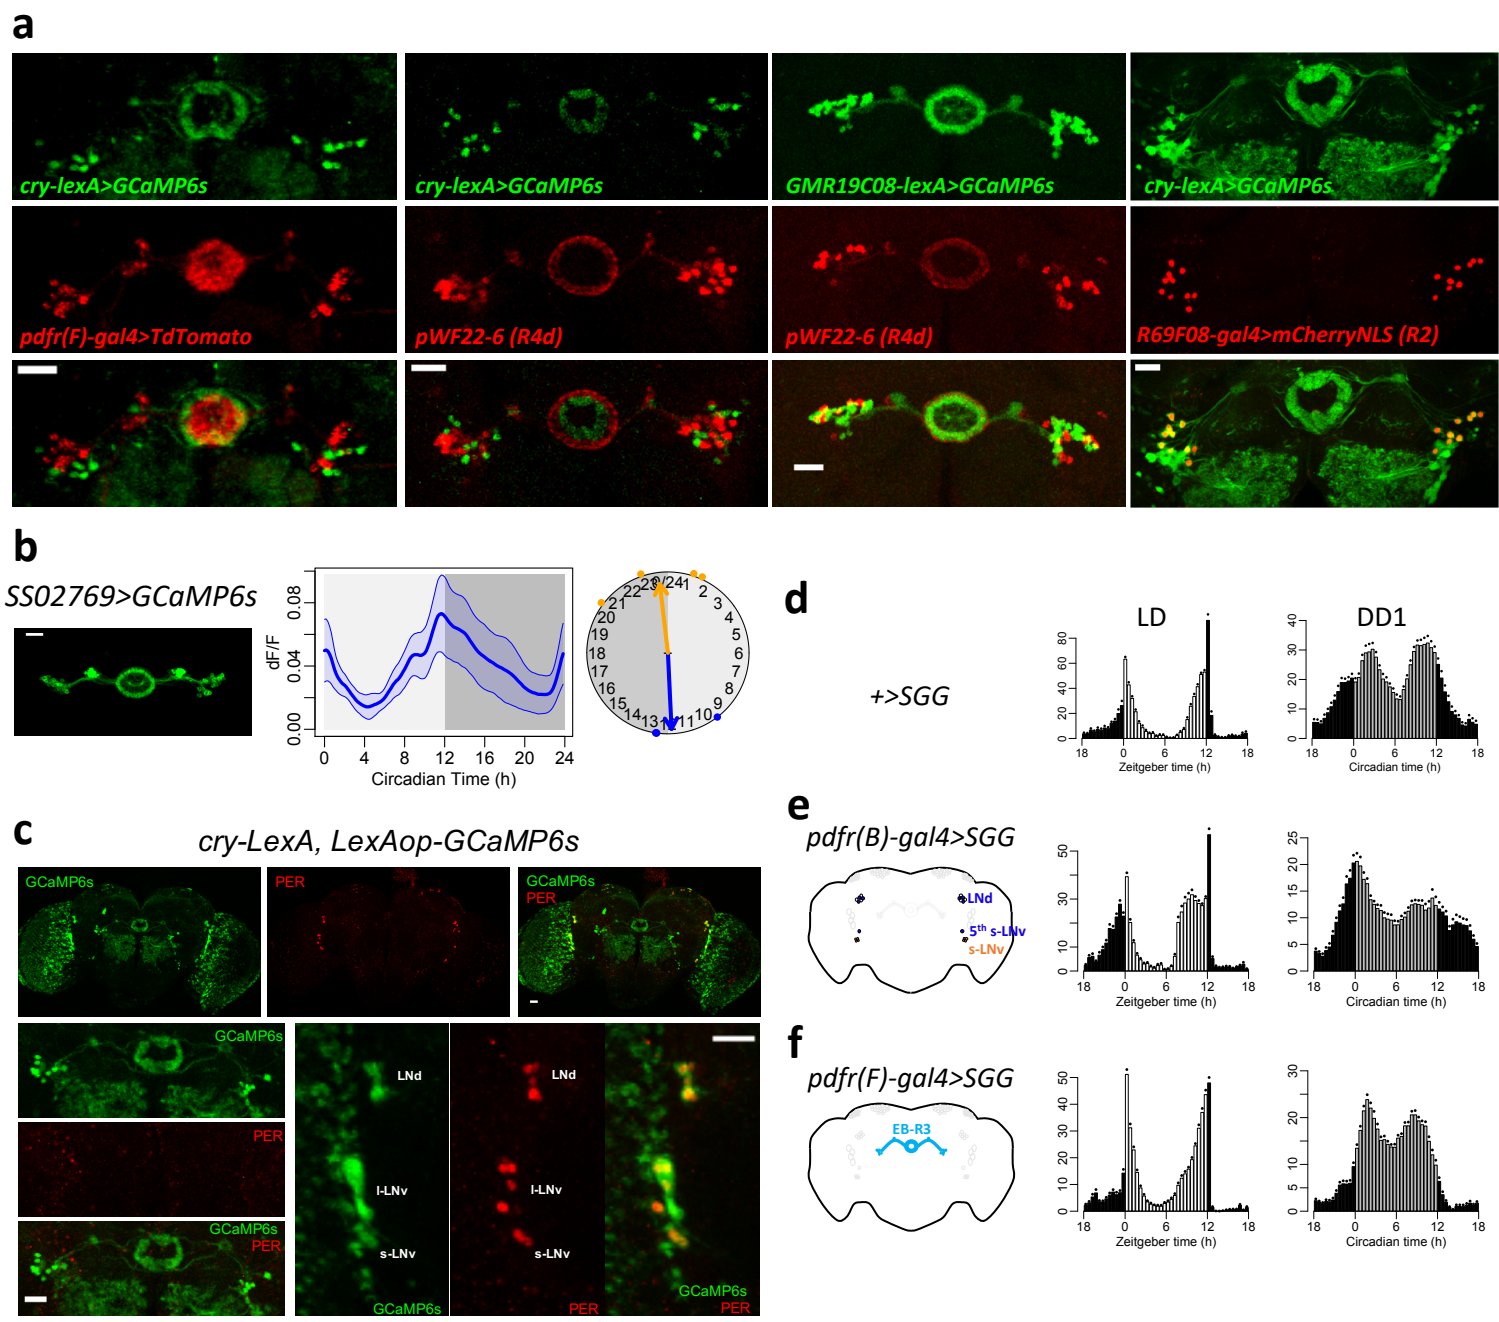

**Extended Data Figure 1. The different subgroups of ellipsoid body (EB) ring neurons do not display circadian pacemaker cell properties.** (a) Confocal images of different subgroups of EB ring with different concentric arborization radii featured by different genetic drivers: the *cry-LexA* pattern did not overlap with that the *pdf(F)-gal4* pattern; the *cry-LexA* pattern did not overlap with the *pWF22-6* pattern (R4d subgroup, see Renn et al 1999); the *GMR19C08(pdf(F))-LexA* pattern did not overlap with the pattern of *pWF22-6*; the *cry-LexA* pattern did overlap with the that of *GMR69F08-GAL4* (R2 subgroup, see Liu et al 2016); Scale bars, 20  $\mu$ m. (b) Daily  $Ca^{2+}$  activity patterns of the EB-RN subgroup R4, labelled by split-gal4 drivers which caused the strongest effect on increasing locomotor activity (Robie et al., 2017). (c) Immunostaining of PER protein in the *cry-LexA, LexAop-GCaMP6s* fly at ZTO. Scale bars, 20  $\mu$ m. PER can be detected in circadian pacemaker neurons, but not in EB-RNs. (d-f) Average locomotor activity of (d) wild type (WT, n = 16 flies), (e) flies with Shaggy (SGG) expressed in s-LNv and three out of six LNd with *pdf(B)-GAL4* (n = 16 flies), and (f) flies with SGG expressed in EB-R3 neurons with *pdf(F)-GAL4* (n = 32 flies) under LD cycles and in the first day under DD (DD1). Accelerating molecular clocks in M and E cells (e) advanced both morning and evening behavioral phases, yet SGG over-expression in EB-RN neurons (f) was inconsequential.

# Extended Data Figure 2

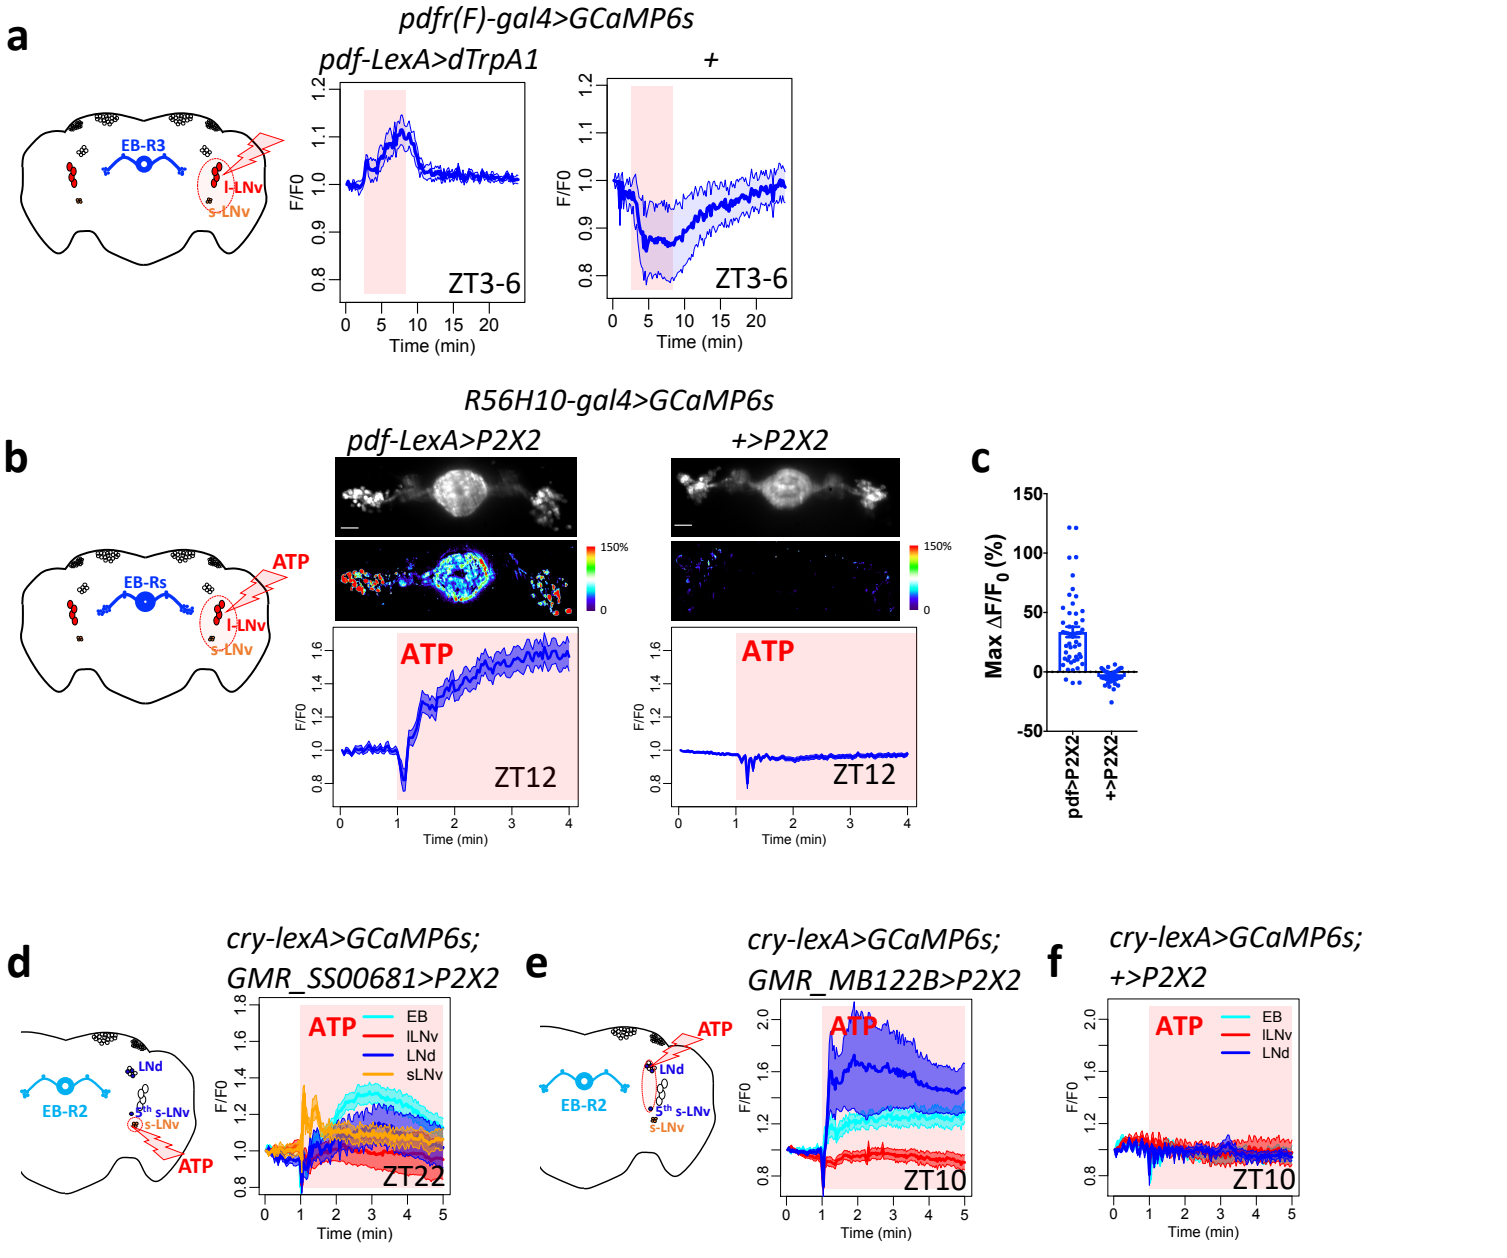

**Extended Data Figure 2. EB-RNs respond to circadian neuron activation.** (a) Left, map of EB-RNs and circadian pacemaker neurons. Right, average traces of EB-R3 neurons responding to increase of temperature in flies with dTrpA1 expressed in PDF neurons (red, n = 7 flies) and in control flies without dTrpA1 expression (blue, n = 4 flies). Red aspect indicates duration of temperature increase. (b) Responses of EB-RNs labelled by *R56H10-gal4* to ATP application in flies with P2X2 expressed in PDF neurons (left, n = 5 flies) and in control flies without P2X2 expression (right, n = 3 flies). Red aspect indicates duration of ATP application. Above, example image baseline Ca<sup>2+</sup> signal and maximum Ca<sup>2+</sup> signal changes. Below, average traces of EB ring neurons. (c) Maximum Ca<sup>2+</sup> signal changes after ATP application in individual EB-RNs in (b). (d) Responses of EB-R2 neurons, and circadian pacemaker neurons labelled by *cry-LexA*, to ATP application in flies with P2X2 expressed in s-LNv (left, n = 6 flies). (e) Responses of EB-R2 neurons and circadian pacemaker neurons labelled by *cry-LexA* to ATP application in flies with P2X2 expressed in E cells: three LNd and the 5<sup>th</sup> s-LNv neurons (left, n = 5 flies) and (f) in control flies without P2X2 expression (right, n = 3 flies).

# Extended Data Figure 3

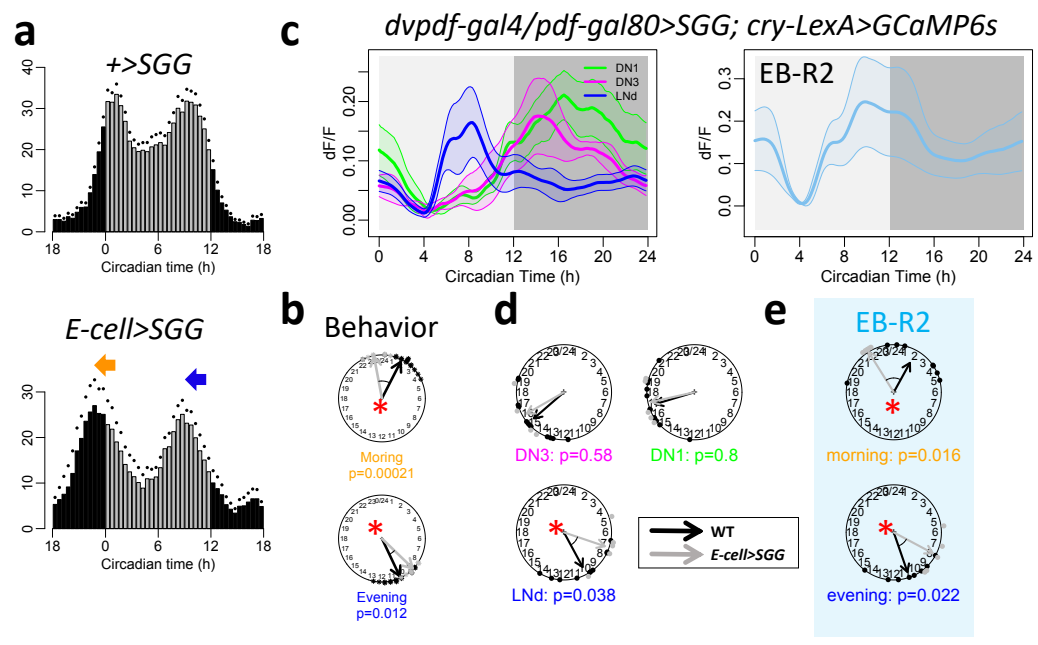

**Extended Data Figure 3. Daily activity phases of output circuits are dictated by different groups of circadian neurons.** (a) Average locomotor activity in DD1 of flies expressing SGG in E pacemaker neurons, entrained under 12hr light: 12hr dark cycles (E-cells>SGG, n = 8 flies). (b) Phases comparisons between WT and E-cells>SGG flies. Note that both morning and evening activity phases were advanced (Watson-Williams test). (c) Daily Ca<sup>2+</sup> activity patterns of (left) circadian pacemaker neurons and (right) EB-R2 neurons in E-cells>SGG flies under DD (n = 5 flies). (d) Phase comparisons of circadian pacemaker neurons between WT and E-cells>SGG. E cells (LNd) were shifted in E-cells>SGG. (e) Both the morning peak and the evening peak of EB-R2 were shifted in E-cells>SGG (\*p < 0.05, Watson-Williams test).

# Extended Data Figure 4

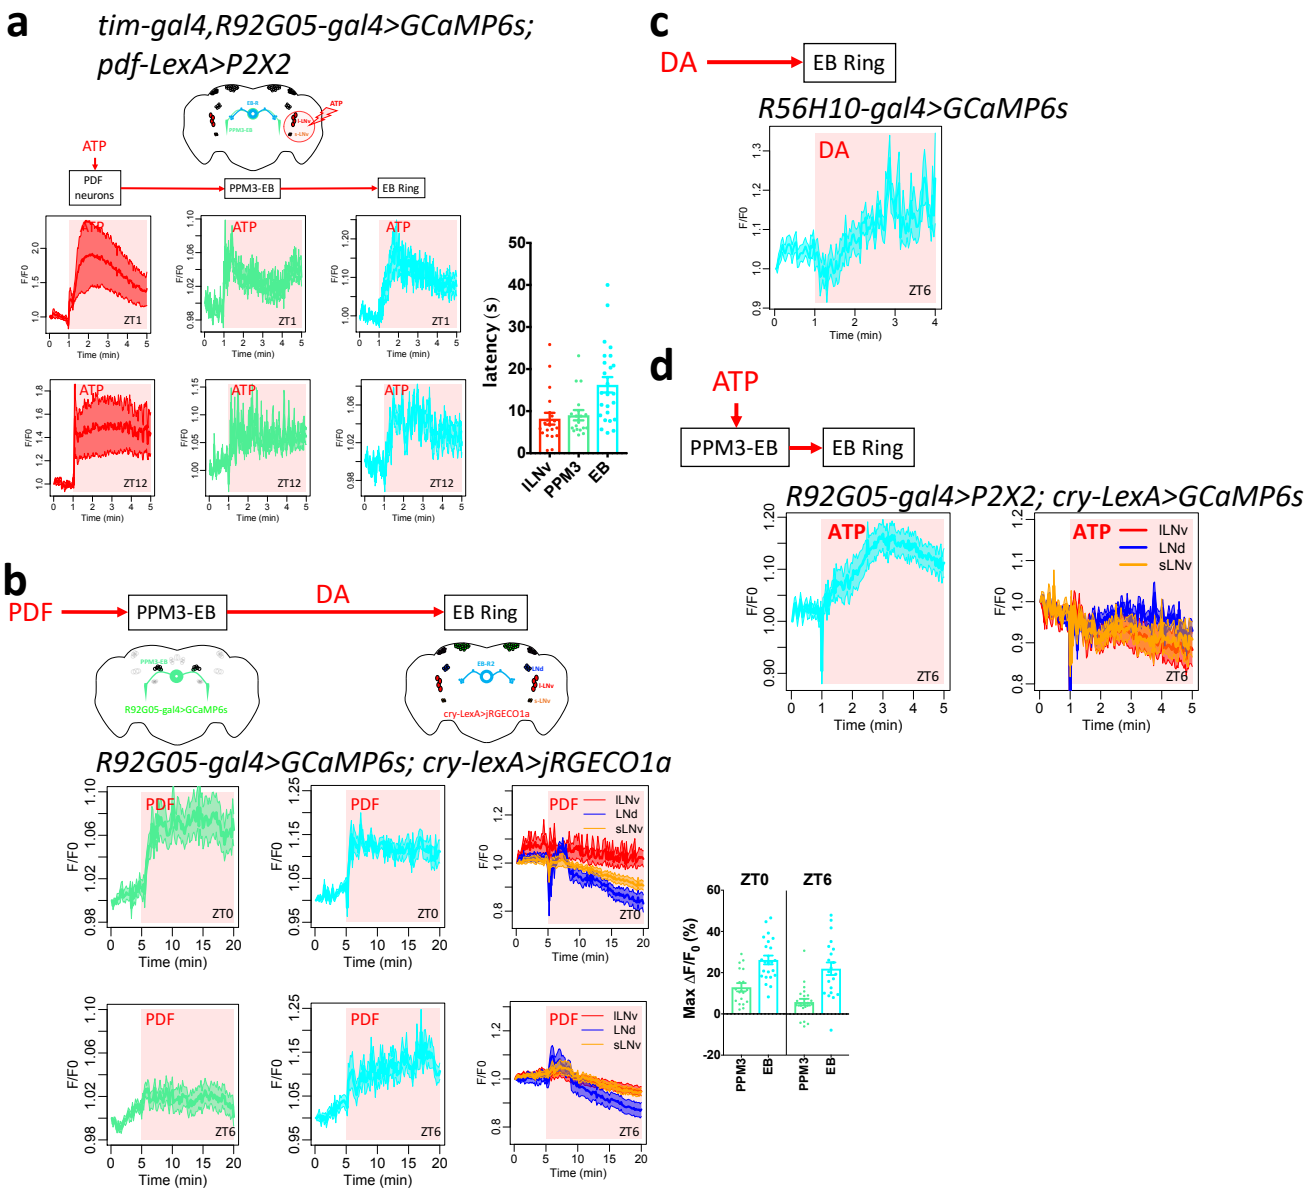

**Extended Data Figure 4. Tests of connections from PDF neurons to PPM3-EB and to EB-RNs.** (a) Above, map of PPM3-EB DA neurons, EB-RNs, and circadian pacemaker neurons. Below-left, average traces of PDF neurons, PPM3-EB neurons, and EB-R1 neurons responding to activation of P2X2-expressing PDF neurons by ATP at two zeitgeber time points: ZT1 (n = 5 flies) and ZT12 (n = 4 flies). Below-right, response latency (onset time constant) of EB-RNs is longer than that of PPM3-EB neurons (p=0.0029, Mann-Whitney test). (b) As in Figure 5b-f, dual-color Ca<sup>2+</sup> imaging: GCaMP6s in PPM3-EB and jRGECO1a in EB-R2 and circadian pacemaker neurons. Below-left, average traces of PPM3-EB neurons, EB-R2 neurons, and circadian pacemaker neurons responding to the bath-application of neuropeptide PDF (10<sup>-5</sup> M) at two zeitgeber time points: ZT0 (n = 3 flies) and ZT6 (n = 3 flies). Below-right, maximum Ca<sup>2+</sup> signal changes in individual cells after PDF bath application. (c) Average traces of EB-RNs responding to the bath-application of dopamine (10<sup>-4</sup> M) at ZT6 (n = 4 flies). (d) Average traces of EB-R2 neurons, and circadian pacemaker neurons labelled by *cry-LexA*, responding to activation of P2X2-expressing PPM3-EB DA neurons by ATP (n = 5 flies). Red aspect indicates duration of drug application. Error bars denote SEM.



# Extended Data Figure 5

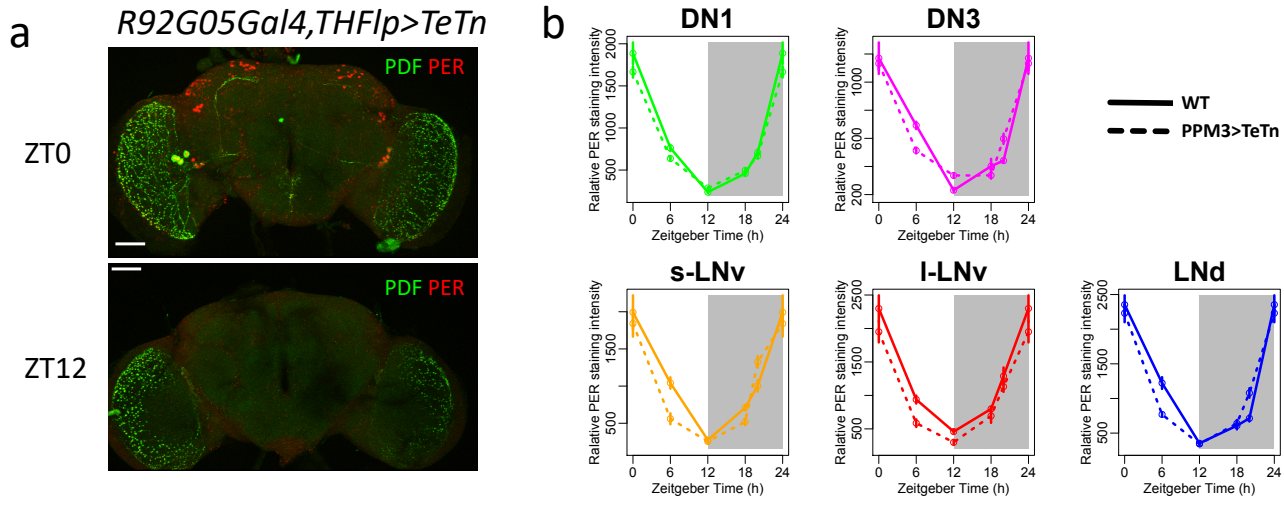

**Extended Data Figure 5. PER protein rhythms of control flies and flies expressing tetanus toxin (TeTn) in PPM3-EB neurons in Figure 5G. (a)** Representative images of immunostaining against PDF and PER at two different time points: ZT0 and ZT12 of flies expressing TeTn in PPM3-EB. **(b)** Quantification of PER protein staining intensity at four different time points in five groups of circadian neurons from control flies and flies expressing TeTn in PPM3-EB ( $n > 3$  flies for each time points).

# Extended Data Table 1

Manipulation of dopamine signal and EB-RNs impair circadian locomotor activity rhythms. AR, arrhythmic. Period and power are calculated by  $\chi^2$  periodogram. Activity represents averaged activity count per 30 min.

| Genotype                                                   | N  | AR  | Period (h) | SEM  | Power | SEM   | Activity | SEM  |
|------------------------------------------------------------|----|-----|------------|------|-------|-------|----------|------|
| <i>R56H10-gal4&gt;+</i>                                    | 15 | 7%  | 23.50      | 0.10 | 88.36 | 10.97 | 20.53    | 2.27 |
| <i>R56H10-gal4&gt;UAS-TeTn</i>                             | 14 | 64% | 24.00      | 0.97 | 10.69 | 3.12  | 6.07     | 1.25 |
|                                                            |    |     |            |      |       |       |          |      |
| <i>TH-Flp/+; R92G05-gal4/+</i>                             | 16 | 0%  | 23.23      | 0.12 | 71.07 | 7.84  | 15.69    | 1.58 |
| <i>TH-Flp/UAS-(FRT.stop)-TeTn;</i>                         | 21 | 24% | 23.17      | 0.12 | 22.15 | 5.01  | 15.43    | 1.57 |
| <i>TH-Flp/UAS-(FRT.stop)-TeTn;</i><br><i>R92G05-gal4/+</i> | 24 | 83% | 23.64      | 0.05 | 3.03  | 1.58  | 13.85    | 4.46 |
|                                                            |    |     |            |      |       |       |          |      |
| <i>R56H10-gal4&gt;+</i>                                    | 31 | 7%  | 23.31      | 0.05 | 67.62 | 8.35  | 16.80    | 1.36 |
| <i>R56H10-gal4&gt;DopR1-miRNA</i>                          | 32 | 3%  | 23.63      | 0.05 | 84.18 | 8.57  | 22.21    | 1.22 |
| <i>R56H10-gal4&gt;DopR2-miRNA</i>                          | 15 | 20% | 23.56      | 0.10 | 33.15 | 7.17  | 22.38    | 1.75 |
| <i>R56H10-gal4&gt;D2R-miRNA</i>                            | 25 | 12% | 23.50      | 0.10 | 26.53 | 4.24  | 9.41     | 1.12 |
| <i>R56H10-gal4&gt;DopEcR-miRNA</i>                         | 15 | 7%  | 23.57      | 0.07 | 72.89 | 5.54  | 19.60    | 1.97 |

## Extended Data Table 2

**List of driver/ reporter lines used in this study.** The nomenclature of ellipsoid body ring neuron (EB-RN) subgroups used in this study – different from that in Omoto et al. (2017) - are here indicated

| Driver / Reporter Lines      | EB-RN subgroup | EB-RN subgroup nomenclature by Omoto et al. (2017) | other cell types                                    |
|------------------------------|----------------|----------------------------------------------------|-----------------------------------------------------|
| <i>tim(UAS)-GAL4</i>         | R1             | R1                                                 | All circadian pacemaker neurons and others          |
| <i>pdf(F)-GAL4</i>           | R3             | R3                                                 | N/A                                                 |
| <i>cry-LexA</i>              | R2             | R5                                                 | CRY-positive circadian pacemaker neurons and others |
| <i>GMR69F08-GAL4</i>         | R2             | R5                                                 | N/A*                                                |
| <i>GMR_SS002769</i>          | R2/R4m         | R2                                                 | N/A                                                 |
| <i>GMR19C08-LexA</i>         | R4m            | R2                                                 | N/A                                                 |
| <i>GMR56H10-GAL4</i>         | R1-4           | R1-5                                               | N/A                                                 |
| <i>pWF22-6-lacZ</i>          | R4d            | R4                                                 | N/A                                                 |
| <i>pdf(B)-GAL4</i>           | N/A            | N/A                                                | all s-LNv, 3 CRY-positive LNd, and 2 DN1            |
| <i>dvpdf-GAL4</i>            | N/A            | N/A                                                | all LNv and 3 CRY-positive LNd                      |
| <i>dvpdf-GAL4, pdf-GAL80</i> | N/A            | N/A                                                | the 5th s-LNv and 3 CRY-positive LNd                |
| <i>GMR_SS00681</i>           | N/A            | N/A                                                | 4 PDF-positive s-LNv                                |
| <i>GMR_MB122B</i>            | N/A            | N/A                                                | the 5th s-LNv and 3 CRY-positive LNd                |
| <i>pdf-LexA</i>              | N/A            | N/A                                                | PDF-positive s-LNv and l-LNv                        |
| <i>GMR92G05-GAL4</i>         | N/A            | N/A                                                | PPM3-EB and others                                  |
| <i>GMR92G05-GAL4, TH-Flp</i> | N/A            | N/A                                                | PPM3-EB                                             |

\*N/A indicates invisible in the brain
